1     **JNK signaling controls branching, nucleokinesis, and positioning of**  
2     **centrosomes and primary cilia in migrating cortical interneurons**

3  
4     Skye E. Smith<sup>1,2,3</sup>, Nicholas K. Coker<sup>1</sup>, and Eric S. Tucker<sup>1,3</sup>

5  
6     <sup>1</sup>Department of Neuroscience, <sup>2</sup>Biochemistry and Molecular Biology Graduate Program,

7     <sup>3</sup>Rockefeller Neuroscience Institute, West Virginia University School of Medicine, Morgantown,  
8     WV 26506.

9  
10    **Correspondence:** etucker@hsc.wvu.edu

11  
12    **Running title:** Interneuron dynamics require JNK

13  
14    **Key Words:** GABAergic interneuron; development; forebrain; intracellular signaling; neuronal  
15    migration; live imaging

16  
17    **Summary Statement:** Loss of JNK signaling reduces growth cone branching frequency, limits  
18    interstitial side branch duration, alters rate and amplitude of nucleokinesis, and mislocalizes  
19    centrosomes and primary cilia in migrating cortical interneurons.

34 **ABSTRACT**

35 Aberrant migration of inhibitory interneurons can alter the formation of cortical circuitry and lead  
36 to severe neurological disorders including epilepsy, autism, and schizophrenia. However,  
37 mechanisms involved in directing the migration of these cells remain incompletely understood.  
38 In the current study, we used live-cell confocal microscopy to explore the mechanisms by which  
39 the c-Jun NH<sub>2</sub>-terminal kinase (JNK) pathway coordinates leading process branching and  
40 nucleokinesis, two cell biological processes that are essential for the guided migration of cortical  
41 interneurons. Pharmacological inhibition of JNK signaling disrupts the kinetics of leading  
42 process branching, rate and amplitude of nucleokinesis, and leads to the rearward  
43 mislocalization of the centrosome and primary cilium to the trailing process. Genetic loss of *Jnk*  
44 from interneurons corroborates our pharmacological observations and suggests that important  
45 mechanics of interneuron migration depend on the intrinsic activity of JNK. These findings  
46 suggest that JNK signaling regulates leading process branching, nucleokinesis, and the  
47 trafficking of centrosomes and cilia during interneuron migration, and further implicates JNK  
48 signaling as an important mediator of cortical development.

49

50 **SYMBOLS AND ABBREVIATIONS**

51 MGE: Medial ganglionic eminence  
52 CGE: Caudal ganglionic eminence  
53 JNK: c-Jun NH<sub>2</sub>-terminal kinase  
54 Dcx: Doublecortin  
55 Cetn2-mCherry: Centrin2-mCherry  
56 *Dlx5/6-CIE: Dlx5/6-Cre-IRES-EGFP*  
57 *cTKO*: conditional *Jnk* triple knockout  
58 WT: Wild type  
59 MAPK: mitogen-activated protein kinase  
60 cHBSS: complete Hank's Balanced Salt Solution  
61 Shh: Sonic hedgehog  
62 E14.5: Embryonic day 14.5  
63  $\mu$ : Micro  
64 Cxcr4: C-X-C motif chemokine receptor 4  
65 ErbB4: erb-b2 receptor tyrosine kinase 4  
66 5-Htr6: Serotonin receptor 6  
67 s.e.m.: standard error of the mean

## 68 INTRODUCTION

69 During embryonic development, cortical interneurons are born in the medial and caudal  
70 ganglionic eminences (MGE and CGE) of the ventral forebrain and then migrate long distances  
71 to reach the place of their terminal differentiation in the overlying cerebral cortex (Miyoshi et al.,  
72 2010; Nery et al., 2002; Wichterle et al., 1999; Xu et al., 2004). While navigating their  
73 environments, cortical interneurons must integrate extracellular guidance cues with intracellular  
74 machinery in order to reach the cortex, assemble and travel in tangentially oriented streams,  
75 and disembark from streams at the correct time and place to properly infiltrate the cortical plate.  
76 Two cellular mechanisms that enable interneurons to make these complex migratory decisions  
77 are leading process branching, where cortical interneurons dynamically remodel their leading  
78 processes to sense and respond to extracellular guidance cues, and nucleokinesis, where  
79 interneurons propel their cell bodies forward in the selected direction of migration (Ang et al.,  
80 2003; Bellion et al., 2005; Moya and Valdeolmillos, 2004; Nadarajah et al., 2003; Polleux et al.,  
81 2002). Moreover, proper positioning and signaling from two subcellular organelles, the  
82 centrosome and primary cilium, have been implicated in the guided migration of cortical  
83 interneurons (Higginbotham et al., 2012; Luccardini et al., 2013; Luccardini et al., 2015;  
84 Yanagida et al., 2012). Failure to coordinate these cellular and subcellular events can alter  
85 cortical interneuron migration and impair the development of cortical circuitry, which may  
86 underlie severe neurological disorders such as autism spectrum disorder, schizophrenia, and  
87 epilepsy (Hildebrandt et al., 2011; Kato and Dobyns, 2005; Meechan et al., 2012; Volk et al.,  
88 2015). While progress has been made on elucidating the complex molecular mechanisms  
89 underlying nucleokinesis and leading process branching (Baudoin et al., 2012; Godin et al.,  
90 2012; Silva et al., 2018; Tsai and Gleeson, 2005), the intracellular signaling pathways that  
91 regulate these cellular mechanisms remain largely unknown.

92 The c-Jun NH<sub>2</sub>-terminal kinases (JNKs) are evolutionarily conserved members of the mitogen-  
93 activated protein kinase (MAPK) super-family (Chang and Karin, 2001; Davis, 2000). The JNK  
94 proteins are encoded by three genes, *Jnk1* (*Mapk8*), *Jnk2* (*Mapk9*), and *Jnk3* (*Mapk10*). JNKs  
95 phosphorylate numerous substrates in response to extracellular stimuli to mediate physiological  
96 processes including cellular proliferation, apoptosis, differentiation, and migration (Davis, 2000).  
97 Disruption to JNK signaling has been linked to aberrant migration of excitatory cortical neurons  
98 (Hirai et al., 2006; Wang et al., 2007; Westerlund et al., 2011; Yamasaki et al., 2011; Zhang et  
99 al., 2016) as well as cognitive disorders in humans (Kunde et al., 2013; McGuire et al., 2017).  
100 More recently, we found that JNK signaling controls the timing of interneuron entry into the

101 cerebral cortex, as well as the formation and maintenance of tangential streams of cortical  
102 interneurons (Myers et al., 2020; Myers et al., 2014), but the role that JNK plays in the migratory  
103 properties of individual cortical interneurons has not been examined.

104 In the current study, we use a combination of pharmacological and genetic manipulations in an  
105 MGE explant cortical cell co-culture assay to demonstrate that interneurons have a requirement  
106 for JNK-signaling in the regulation of leading process branching and nucleokinesis. JNK-  
107 inhibited MGE interneurons dramatically slow their migration while displaying more variable  
108 speeds, and exhibit decreased migratory displacement. Concomitantly, JNK-inhibited  
109 interneurons display significant defects in leading process branching with decreased growth  
110 cone splitting frequency and interstitial side branch duration, as well as disrupted nucleokinesis  
111 and swelling dynamics. Similarly, genetic ablation of *Jnk* from MGE interneurons also results in  
112 leading process branching and nucleokinesis defects, suggesting interneurons have a cell-  
113 intrinsic requirement for JNK signaling during migration. In addition, we discovered a novel role  
114 for JNK signaling in the dynamic localization of the centrosome and primary cilium in migrating  
115 interneurons. Surprisingly, the centrosomes and the primary cilia of JNK-inhibited interneurons  
116 aberrantly localized to the cell body or trailing process, regardless of whether the leading  
117 process contained a swelling. These findings implicate the JNK pathway as a key intracellular  
118 mediator of leading process branching, nucleokinesis, and organelle dynamics in migrating  
119 MGE interneurons.

## 120 RESULTS

### 121 ***Pharmacological inhibition of JNK signaling disrupts MGE interneuron migration in vitro***

122 c-Jun NH<sub>2</sub>-terminal kinase (JNK) signaling is required for the initial entry of cortical interneurons  
123 into the cortical rudiment and the tangential progression of interneurons in migratory streams  
124 (Myers et al., 2020; Myers et al., 2014). In the current study, we examined the role that JNK  
125 plays in the migratory dynamics of individual interneurons. To study interneuron migration at  
126 high spatial and temporal resolution, we performed live-cell confocal imaging of medial  
127 ganglionic eminence (MGE) explant cortical cell co-cultures. MGE explants from embryonic day  
128 14.5 (E14.5) *Dlx5/6-Cre-IRES-EGFP (Dlx5/6-CIE)* positive embryos were cultured on top of a  
129 *Dlx5/6-CIE* negative (wild type, WT) monolayer of dissociated cortical cells for 24 hours (Fig.  
130 1A). Cultures were treated with 20 μM SP600125, a pan JNK inhibitor (Bennett et al., 2001), or  
131 vehicle control and immediately imaged live for 12 hours (Fig. 1A). At the beginning of imaging  
132 (Time 0), the field of view was placed at the distal edge of interneuron outgrowth (Fig. 1B-C).

133 Many control interneurons migrated into the field of view by 12 hours of imaging (Fig. 1B; Movie  
134 1), but SP600125-treated cells failed to progress through the frame and appeared to move  
135 slower (Fig. 1C; Movie 2). To assess potential differences in their migratory dynamics, we  
136 tracked individual cells in order to evaluate how JNK inhibition affects interneuron migration on a  
137 single cell level (representative cell tracks in Fig. 1B, C). The migratory speeds of JNK-inhibited  
138 interneurons were significantly slower than controls, including the maximum (values =  
139 mean $\pm$ s.e.m.; control: 132.28 $\pm$ 4.25 $\mu$ m/hour; SP600125: 78.02 $\pm$ 1.69 $\mu$ m/hour;  $p=1.68\times 10^{-10}$ ),  
140 mean (control: 54.62 $\pm$ 2.54 $\mu$ m/hour; SP600125: 26.48 $\pm$ 0.94 $\mu$ m/hour;  $p=1.68\times 10^{-9}$ ), and minimum  
141 (control: 6.64 $\pm$ 0.91 $\mu$ m/hour; SP600125: 1.96 $\pm$ 0.21 $\mu$ m/hour;  $p=7.17\times 10^{-5}$ ) migratory speeds (Fig.  
142 1D). While JNK-inhibited interneurons migrated slower, speed variation, which is the ratio of  
143 track standard deviation to track mean speed was significantly increased in SP600125-treated  
144 conditions (control: 0.62 $\pm$ 0.02; SP600125 0.76 $\pm$ 0.02;  $p=0.00019$ ; Fig. 1E). Due to the decrease  
145 in migratory speed, the normalized migratory displacement of SP600125-treated interneurons  
146 was also significantly reduced compared to control interneurons (control: 156.93 $\pm$ 10.37 $\mu$ m;  
147 SP600125: 75.76 $\pm$ 4.04  $\mu$ m;  $p=4.73\times 10^{-7}$ ; Fig. 1F). Despite these changes in overall migratory  
148 dynamics, JNK-inhibited interneurons displayed no change in their migratory straightness  
149 (control: 0.71 $\pm$ 0.03; SP600125: 0.68 $\pm$ 0.02;  $p=0.45$ ; Fig. 1G). Collectively, these data suggest  
150 that JNK inhibition alters the migratory behavior of MGE interneurons by reducing their  
151 migratory speed and the overall displacement of their migratory trajectories.

### 152 ***JNK signaling regulates branching dynamics of migrating MGE interneurons***

153 Migrating cortical interneurons repeatedly extend and retract leading process branches to sense  
154 extracellular guidance cues and establish a forward direction of movement (Bellion et al., 2005;  
155 Polleux et al., 2002; Yanagida et al., 2012). Leading process branching normally occurs through  
156 two mechanisms: growth cone splitting at the distal end of the leading process, and formation of  
157 interstitial side branches along the length of the leading process (Lysko et al., 2011; Martini et  
158 al., 2009).

159 To determine if JNK inhibition effected leading process morphology, we first measured the  
160 length of leading processes over time from live-imaged *Dlx5/6-CIE* positive MGE interneurons.  
161 Maximum (control: 84.96 $\pm$ 4.45 $\mu$ m; SP600125: 85.14 $\pm$ 4.02 $\mu$ m/hour;  $p=0.977$ ), mean (control:  
162 60.39 $\pm$ 2.88 $\mu$ m; SP600125: 60.14 $\pm$ 2.56 $\mu$ m;  $p=0.947$ ), or minimum lengths (control:  
163 37.40 $\pm$ 2.47 $\mu$ m; SP600125: 37.81 $\pm$ 2.72 $\mu$ m;  $p=0.912$ ) of leading processes of SP600125-treated  
164 interneurons remained unchanged (Fig. 2C). However, when we analyzed the dynamic

165 behavior of leading processes, significant differences were found between interneurons in  
166 control and SP600125-treated conditions (Fig. 2; Movies 3-4). In control conditions, migrating  
167 MGE interneurons show frequent initiation of new branches from growth cone splitting at the tip  
168 of their leading processes (Fig. 2A; Movie 3, Clip 1). In JNK-inhibited conditions, interneurons  
169 still underwent growth cone splitting, but the frequency appeared to be reduced (Fig. 2B; Movie  
170 4, Clip1). When we measured the rate of growth cone splitting, JNK-inhibited interneurons had a  
171 statistically significant reduction compared to controls (control:  $1.83 \pm 0.19$  splits/hour; SP600125  
172  $1.15 \pm 0.20$  splits/hour;  $p=0.02$ ; Fig. 2D). In addition to branching from their growth cones, MGE  
173 interneurons extend and retract interstitial side branches from their leading processes. To  
174 determine whether JNK inhibition impacted the frequency and duration of interstitial branching,  
175 we measured the rate in which new side branches formed and determined the amount of time  
176 each newly generated branch was retained. Both control and SP600125-treated interneurons  
177 extended side branches at similar frequencies (control:  $1.33 \pm 0.22$  branches/hour;  
178 SP600125:  $1.37 \pm 0.19$  branches/hour;  $p=0.91$ ; Fig. 2 E-G; Movies 3-4, Clip 2). However, the  
179 duration of time in which *de novo* side branches persisted was significantly reduced in  
180 interneurons treated with JNK inhibitor (control:  $28.77 \pm 2.53$ min; SP600125:  $21.19 \pm 1.76$ min;  
181  $p=0.02$ ; Fig. 2H).

182 Here, we found that initiation of branching from growth cone splitting was significantly reduced  
183 during JNK inhibition. JNK-inhibited interneurons also formed side branches at similar rates, but  
184 these branches were shorter-lived than controls. Our data indicate that JNK influences  
185 branching dynamics of migratory MGE interneurons by regulating the rate of growth cone  
186 splitting, and by promoting the stability of newly formed side branches.

### 187 ***Acute loss of JNK signaling impairs nucleokinesis and cytoplasmic swelling dynamics of*** 188 ***migrating MGE interneurons***

189 Since pharmacological inhibition of JNK signaling disrupted the overall migratory properties and  
190 leading process branching dynamics of MGE interneurons, we further examined the role for JNK  
191 in nucleokinesis, an obligate cell biological process in neuronal migration (Bellion et al., 2005;  
192 Yanagida et al., 2012). To closely examine the movement of interneuron cell bodies during  
193 migration, we imaged cultures at higher spatial and temporal resolution and analyzed the effect  
194 of JNK inhibition on nucleokinesis (Fig. 3). Time-lapse recordings show that under control  
195 conditions, a single cycle of nucleokinesis starts with the extension of a cytoplasmic swelling  
196 into the leading process and ends with the translocation of the cell body into the swelling (Fig.

197 3A; Movie 5, Clip 1). Although JNK-inhibited interneurons still engaged in nucleokinesis, the  
198 distance and kinetics of individual nucleokinesis events were disrupted (Fig. 3B; Fig. 3H; Movie  
199 5, Clip 2). When we measured the mean distance that cell bodies advanced over time, JNK-  
200 inhibited interneurons translocated significantly shorter distances compared to control cells  
201 (control:  $14.87 \pm 0.32 \mu\text{m}$ ; SP600125:  $8.50 \pm 0.39 \mu\text{m}$ ;  $p = 2.36 \times 10^{-10}$ ; Fig. 3C). Thus, while cell  
202 bodies of JNK-inhibited interneurons still translocated forward into the leading process, the  
203 distance of their movement was reduced.

204 Since nucleokinesis is cyclical, with the cell extending a swelling, translocating its cell body,  
205 then pausing before repeating the process, we measured the rate of nucleokinesis in control  
206 and JNK-inhibited conditions. Upon treatment with SP600125, interneurons completed  
207 significantly fewer translocation events per hour (control:  $2.50 \pm 0.06$  events/hour; SP600125:  
208  $1.73 \pm 0.06$  events/hour;  $p = 1.92 \times 10^{-8}$ ; Fig. 3D). Along with this, interneurons in JNK-inhibited  
209 cultures displayed longer pauses between the initiation of nucleokinesis events (control:  
210  $31.21 \pm 1.05$  min; SP600125:  $40.71 \pm 0.58$  min;  $p = 1.45 \times 10^{-7}$ ; Fig. 3E). Because nuclear  
211 translocation is preceded by swelling extension, we measured the average distance from the  
212 soma to the swelling before translocation and found that SP600125-treated interneurons did not  
213 extend cytoplasmic swellings as far as controls (control:  $13.13 \pm 0.38 \mu\text{m}$ ; SP600125:  
214  $11.34 \pm 0.30 \mu\text{m}$ ;  $p = 0.002$ ; Fig. 3F). Since JNK-inhibited interneurons paused for longer periods of  
215 time, we asked if this was strictly due to delayed nuclear propulsion towards the swelling, or if  
216 the dynamics of swelling extension were also affected. Interneurons treated with SP600125  
217 displayed significantly longer lasting cytoplasmic swellings (control:  $11.27 \pm 0.99$  min; SP600125:  
218  $18.31 \pm 1.33$  min;  $p = 0.0005$ ; Fig. 3G), indicating that swelling duration is concomitantly increased  
219 with pause duration. Finally, the frequency and amplitude of nuclear translocations that exceed  
220 a minimum distance of 5 microns was notably reduced when individual control and JNK-  
221 inhibited cells were compared (Fig. 3H).

222 Together, these data point to a role for JNK signaling in regulating the distance and kinetics of  
223 nucleokinesis in migrating MGE interneurons, which likely contributes to the decrease in  
224 migratory speed and displacement that occurs during JNK inhibition.

225

226

227 **Complete genetic loss of JNK impairs nucleokinesis and leading process branching of**  
228 **migrating MGE interneurons in vitro**

229 Since acute pharmacological inhibition of JNK activity altered the dynamic behavior of migratory  
230 cortical interneurons, we next asked whether genetic removal of JNK function from MGE  
231 interneurons also impaired their migration. In order to genetically ablate all three JNK genes  
232 from interneurons, we used mice containing the *Dlx5/6-CIE* transgene to conditionally remove  
233 *Jnk1* from *Jnk2;Jnk3* double knockout embryos (*Dlx5/6-CIE;Jnk1<sup>fl/m</sup>;Jnk2<sup>-/-</sup>;Jnk3<sup>-/-</sup>*). Using this  
234 conditional triple knockout (*cTKO*) model, we modified our assay to determine if MGE  
235 interneurons have an intrinsic genetic requirement for JNK in their migration. MGE explants  
236 from *Dlx5/6-CIE+* wild type (WT) and *cTKO* brains were cultured on a WT cortical feeder layer  
237 and imaged live (Fig. 4A). We tracked individual interneurons over time to assess the overall  
238 migratory properties of WT and *cTKO* interneurons (Fig. 4B,C). While there were no changes in  
239 migratory speed (Fig. 4D), *cTKO* interneurons exhibited greater variations in migratory speed  
240 compared to WT cells (WT:  $0.54 \pm 0.01$ ; *cTKO*:  $0.59 \pm 0.02$ ;  $p=0.02$ ; Figure 4E). We also found  
241 that *cTKO* interneurons have shorter migratory displacements than WT interneurons (WT:  
242  $195.06 \pm 6.80 \mu\text{m}$ ; *cTKO*:  $165.99 \pm 12.49 \mu\text{m}$ ;  $p=0.05$ ; Fig. 4F). Additionally, the track straightness  
243 of *cTKO* interneurons was decreased (WT:  $0.77 \pm 0.02$ ; *cTKO*:  $0.71 \pm 0.02$ ;  $p=0.03$ ; Figure 4G).  
244 The combination of increased speed variability and decreased migratory straightness explain  
245 why *cTKO* interneurons exhibited shorter migratory displacements. Together, these data  
246 indicate that *cTKO* interneurons have subtle yet statistically significant deficits in their overall  
247 migratory dynamics, similar to pharmacological inhibition of JNK .

248 To determine the genetic requirement for JNK signaling in branching, we analyzed leading  
249 process branching dynamics of *cTKO* and WT interneurons (Movies 6-7). *cTKO* interneurons  
250 displayed a significant reduction in the frequency of growth cone splitting compared to WT  
251 interneurons (WT:  $1.92 \pm 0.18$  splits/hour; *cTKO*:  $1.30 \pm 0.11$  splits/hour;  $p=0.04$ ; Fig. 4H; Movie 6-  
252 7, Clip 1). In addition, genetic removal of JNK signaling from interneurons resulted in no change  
253 in side branch initiation (WT:  $1.43 \pm 0.15$ ; *cTKO*:  $1.32 \pm 0.20$  branches/hour;  $p=0.66$ ; Fig. 4I), but  
254 significant decreases in the duration that side branches persisted (WT:  $25.51 \pm 3.39$ min;  
255 *cTKO*:  $17.29 \pm 1.71$ min;  $p=0.05$ ; Fig. 4J; Movie 6-7, Clip 2). These data corroborate the findings  
256 from our pharmacological analyses and further suggest a key role for JNK signaling in  
257 controlling leading process branching dynamics.



258 Since we found alterations to overall migratory properties and branching dynamics, we next  
259 analyzed migrating *cTKO* interneurons for defects in nucleokinesis. Although *cTKO* interneurons  
260 engaged in nucleokinesis, the kinetics of nucleokinesis were significantly altered compared to  
261 WT interneurons (Fig. 5). The average distance *cTKO* cells traveled forward during  
262 nucleokinesis was significantly shorter compared to that of the WT cells (WT:  $15.08 \pm 0.28 \mu\text{m}$ ;  
263 *cTKO*:  $14.16 \pm 0.26 \mu\text{m}$ ;  $p=0.03$ ; Fig. 5A-C). However, unlike during acute pharmacological  
264 inhibition of JNK signaling, *cTKO* interneurons displayed increased rates of nucleokinesis (Fig  
265 5A, B; Movie 8). Genetic ablation of JNK signaling in migrating MGE interneurons resulted in  
266 increased frequency of translocation events (WT:  $2.76 \pm 0.05$  events/hour; *cTKO*:  
267  $3.22 \pm 0.11$  events/hour;  $p=0.002$ ; Fig. 5D). While both WT and *cTKO* cells paused after the  
268 completion of a nucleokinesis event (after the cell body moves into the swelling), *cTKO* cells  
269 spent significantly less time pausing before they extended a new swelling (WT:  $32.10 \pm 0.62$  min;  
270 *cTKO*  $27.01 \pm 1.02$  min;  $p=0.0005$ ; Fig. 5E). When we measured the duration of time that  
271 cytoplasmic swellings persisted, the swellings in *cTKO* interneurons were significantly shorter-  
272 lived (WT:  $10.47 \pm 0.62$  min; *cTKO*:  $7.86 \pm 0.19$  min;  $p=0.003$ ; Fig 5F). These data likely explain  
273 why we did not observe an overall change in migratory speeds between *cTKO* and WT  
274 interneurons. While *cTKO* interneurons are not migrating as far during each translocation event  
275 they are initiating nucleokinesis at a faster rate, thus moving at similar speeds compared to  
276 controls.

277 Collectively, our data suggest that genetic removal of *Jnk* alters the migratory behavior of MGE  
278 interneurons. While the phenotypes observed with conditional removal of *Jnk* from migrating  
279 interneurons was not identical to pharmacological inhibition of JNK signaling, our results  
280 indicate that interneurons require *Jnk* for correct leading process branching dynamics and  
281 nucleokinesis.

### 282 ***Subcellular localization and dynamic behavior of the centrosome and primary cilia in*** 283 ***migrating MGE interneurons depend on intact JNK-signaling***

284 The cytoplasmic swelling emerges from the cell body during nucleokinesis and contains multiple  
285 subcellular organelles involved in the forward movement of cortical interneurons (Bellion et al.,  
286 2005; Martini and Valdeolmillos, 2010; Yanagida et al., 2012). One organelle involved in  
287 nucleokinesis is the centrosome, which translocates from the cell body into the swelling during  
288 nucleokinesis. The centrosome is tethered to the nucleus through a perinuclear cage of  
289 microtubules and acts to generate a forward pulling force on the nucleus during nucleokinesis

290 (Bellion et al., 2005; Umeshima et al., 2007). Disruptions in centrosome motility and positioning  
291 are thought to underly nucleokinesis defects seen in other studies of neuronal migration  
292 (Luccardini et al., 2013; Luccardini et al., 2015; Silva et al., 2018; Solecki et al., 2009). Since we  
293 found significant defects in nucleokinesis in migrating MGE interneurons, we sought to  
294 determine if centrosome dynamics were also disrupted during JNK inhibition.

295 To visualize the centrosome and study the role of JNK signaling in centrosome dynamics in  
296 migrating MGE interneurons, we live-imaged *Dlx5/6-CIE+* cells expressing a red-fluorescent  
297 centrosome marker, Cctn2-mCherry (Fig. 6A). In control cells, the centrosome moved correctly  
298 into the cytoplasmic swelling (Fig 6B; Movie 9, Clip 1), with centrioles occasionally splitting  
299 between the soma and swelling preceding nucleokinesis (Fig. 6B, frames 0:00-0:10 minutes), as  
300 reported elsewhere (Bellion et al., 2005; Umeshima et al., 2007). Upon JNK-inhibition, the  
301 centrosome often maintained a position near the soma regardless of the presence of a swelling  
302 (Fig. 6C; Movie 9, Clip 2-3). Moreover, in many JNK-inhibited cells, the centrosome moved  
303 backwards into the trailing process, even when the cell body translocated forward (Fig. 6C;  
304 Movie 9, Clip 2-3). When we tracked the positioning of the centrosome over time, the  
305 centrosome of JNK-inhibited cells spent significantly more time in the trailing process and less  
306 time in the leading process ( $P=0.0001$ ; Fig. 6D). Additionally, when a swelling was formed in  
307 front of the soma, the centrosome of JNK-inhibited cells spent significantly less time inside of  
308 the swelling than controls (control:  $66.64\pm 5.99\%$ ; SP600125:  $16.08\pm 5.52\%$  of time;  $P=0.0001$ ;  
309 Fig. 6E). When we measured the average maximal distance that the centrosome was displaced  
310 from the somal front, the centrosome of JNK-inhibited interneurons maintained a significantly  
311 closer position to the leading pole of the soma compared to controls (control:  $9.93\pm 0.99\mu\text{m}$ ;  
312 SP600125:  $6.73\pm 0.88\mu\text{m}$ ;  $p=0.03$ ; Fig. 6F). This was not surprising since the soma-to-swelling  
313 distance in JNK-inhibited interneurons was decreased (Fig. 3E). However, when we compared  
314 the average maximal rearward distance between the centrosome and somal front, the  
315 centrosome of JNK-inhibited interneurons was significantly further behind that of  
316 controls (control:  $9.40\pm 0.77\mu\text{m}$ ; SP600125:  $19.75\pm 1.94\mu\text{m}$ ;  $p=1.48\times 10^{-5}$ ; Fig. 6F).

317 Since we found defects in centrosome dynamics, we wanted to determine whether primary cilia,  
318 which normally extend from the mother centriole and house receptors important for the guided  
319 migration of cortical interneurons (Baudoin et al., 2012; Higginbotham et al., 2012), were also  
320 perturbed in interneurons following JNK-inhibition. In order to study the localization of cilia in  
321 migrating interneurons, we performed live-cell confocal imaging on *Dlx5/6-CIE+* MGE cells  
322 expressing Arl13b-tdTomato, a red-fluorescent cilia marker.

323 Almost identical to that of our centrosome analyses, we found significant alterations in the  
324 dynamic positioning of primary cilia in migrating MGE interneurons (Fig. 7). In control cells, the  
325 primary cilium moved into the cytoplasmic swelling before nuclear translocation (Fig. 7A; Movie  
326 10, Clip 1). However, upon JNK inhibition, the cilium was frequently positioned in the soma and  
327 often moved into the trailing process as the cell body translocated forward (Fig. 7B; Movie 10,  
328 Clip 2-3). Overall, the cilia spent significantly more time in the cell soma and behind the cell in  
329 the trailing process, and significantly less time in the leading process of JNK-inhibited cells  
330 ( $P=0.0001$ ; Fig. 7C). Additionally, the primary cilia in JNK-inhibited interneurons failed to spend  
331 as much time in formed cytoplasmic swellings as controls (control:  $73.73\pm 7.81\%$  of time;  
332 SP600125:  $33.85\pm 8.20\%$  of time;  $P=0.0001$ ; Fig. 7D). When we measured the maximal distance  
333 behind the somal front, the cilia of JNK-inhibited interneurons were also positioned further  
334 behind the cell body than controls, matching our centrosome findings (control:  $9.71\pm 1.16\mu\text{m}$ ;  
335 SP600125:  $16.09\pm 2.10\mu\text{m}$ ;  $p=0.02$ ; Fig. 7E). Taken together, these data highlight a novel role  
336 for JNK signaling in the dynamic movement and positioning of the centrosome and primary  
337 cilium in migrating MGE interneurons.

## 338 DISCUSSION

339 In the present study, we demonstrated that migrating MGE interneurons rely on the JNK  
340 signaling pathway to properly undergo leading process branching and nucleokinesis.  
341 Pharmacological inhibition of JNK signaling in an *in vitro* assay resulted in reduced migratory  
342 speed and displacement with an increase in speed variation of migrating interneurons.  
343 Concomitant with these alterations in migratory properties, JNK-inhibited interneurons displayed  
344 decreased initiation of branches arising from growth cone tips, decreased persistence of  
345 interstitial side branches, as well as shorter, less frequent nucleokinesis events. Using a  
346 conditional triple knockout (*cTKO*) mouse line to completely remove *Jnk* from MGE  
347 interneurons, *cTKO* interneurons had decreased migratory displacement without reductions in  
348 overall migratory speed, apparently resulting from migratory trajectories that had more variable  
349 speeds and reduced track straightness compared to controls. Moreover, *cTKO* interneurons  
350 displayed significant defects in leading process branching and nucleokinesis. Similar to  
351 pharmacological manipulation, *cTKO* cells displayed shorter nuclear translocations, but unlike  
352 JNK-inhibited interneurons, *cTKO* interneurons completed nucleokinesis at faster rates relative  
353 to controls, which further explained why the overall migratory speed of *cTKO* interneurons was  
354 not impaired. These results indicate that MGE interneurons have a cell-intrinsic requirement in  
355 the coordination of leading process branching and nucleokinesis. Finally, we found a novel role

356 of JNK signaling in regulating the dynamic positioning of two organelles involved in  
357 nucleokinesis: the centrosome and primary cilium. Centrosomes and primary cilia failed to  
358 properly translocate into a leading process swelling and spent significantly more time  
359 mislocalized to the trailing process of JNK-inhibited interneurons. Together, these results  
360 suggest that JNK signaling is required to maintain the cellular kinetics underlying MGE  
361 interneuron migration.

### 362 ***Cytoskeletal regulation during leading process branching and nucleokinesis of migrating*** 363 ***interneurons***

364 Leading process branching and nucleokinesis—the two main features of guided interneuron  
365 migration—rely on the coordination of actomyosin and microtubule-based cytoskeletal networks.  
366 Leading process branches initially form through membrane protrusions containing a F-actin  
367 meshwork, which are then stabilized by microtubules to allow for the emergence of the nascent  
368 branch (Lysko et al., 2014; Martini et al., 2009; Peyre et al., 2015; Spillane et al., 2011).  
369 Nucleokinesis is thought to be mediated through the combination of the forward pulling forces  
370 from microtubules at the front of the cell and pushing forces from actomyosin contraction at the  
371 rear (Bellion et al., 2005; Martini and Valdeolmillos, 2010; Martini et al., 2009). While  
372 mechanisms underlying these processes are still under investigation, several molecular  
373 mediators of microtubule and actin dynamics in migrating interneurons have emerged, and  
374 interestingly, have been linked to JNK signaling in other cells.

375 For instance, p27<sup>kip1</sup>, a microtubule associated protein, coordinates both actomyosin contraction  
376 and microtubule organization to control leading process branching and nucleokinesis in  
377 migrating interneurons (Godin et al., 2012). Conditional deletion of p27<sup>kip1</sup> from post-mitotic  
378 interneurons resulted in slower migratory speed, increased frequency of nucleokinesis, and  
379 shorter distance of translocations. Similarly, *cTKO* interneurons had shorter translocation  
380 distances and increased rates of nucleokinesis. In addition, p27<sup>kip1</sup> knockout interneurons  
381 displayed shorter-lived side branches, similar to our findings with both pharmacological and  
382 genetic loss of JNK. JNK signaling was reported to regulate p27<sup>kip1</sup> phosphorylation during  
383 cancer cell migration (Kim et al., 2012), suggesting a possible link between JNK signaling and  
384 this molecular mediator of cellular migration.

385 Another important regulator of nucleokinesis and leading process branching is the microtubule  
386 associated protein Doublecortin (Dcx; Friocourt et al., 2007; Kappeler et al., 2006), which is a  
387 downstream target of JNK signaling in neurons (Gdalyahu et al., 2004; Jin et al., 2010). Cortical

388 interneurons lacking Dcx show a decreased duration of interstitial side branches, and  
389 significantly shorter nuclear translocation distances with no overall changes in migratory speed  
390 (Kappeler et al., 2006), similar to what we found in *cTKO* interneurons. Thus, it is possible that  
391 JNK signaling fine-tunes leading process branching and nucleokinesis in cortical interneurons  
392 by phosphorylating Dcx.

393 Recently, the role of the Elongator complex, specifically the enzymatic core Elp3, was found to  
394 control both leading process branching and nucleokinesis through the regulation of actomyosin  
395 activity (Tielens et al., 2016). MGE interneurons devoid of Elp3 displayed nucleokinesis and  
396 leading process branching defects strikingly similar to our pharmacological results, including  
397 decreased migratory speed, translocation frequency, nucleokinesis amplitude, and frequency of  
398 growth cone splitting (Tielens et al., 2016). Moreover, the Elongator complex was found to  
399 potentiate JNK activity during cellular stress in HeLa and HEK293 cells (Holmberg et al., 2002;  
400 Kojic and Wainwright, 2016). This suggests that the Elongator complex may potentiate the  
401 activity of JNK to phosphorylate effector proteins required for proper migration of interneurons.  
402 While the exact mechanisms underlying how cytoskeletal modulators interact to control the  
403 guided migration of cortical interneurons remain to be determined, JNK may be a key signaling  
404 node required to coordinate these cellular behaviors.

#### 405 ***Position and function of the centrosome and primary cilium during cortical interneuron*** 406 ***migration***

407 During the migration cycle of cortical interneurons, a cytoplasmic swelling containing two  
408 interconnected organelles, the centrosome and primary cilium, extends ahead of the soma into  
409 the leading process (Bellion et al., 2005; Tsai and Gleeson, 2005). Disruptions to the  
410 movement, positioning, and function of these organelles are often found in interneurons with  
411 migratory deficits (Baudoin et al., 2012; Higginbotham et al., 2012; Luccardini et al., 2013;  
412 Matsumoto et al., 2019; Nakamuta et al., 2017).

413 Migratory olfactory bulb interneurons require DOCK7, a member of the DOCK180 family of  
414 atypical Rac/Cdc42 guanine nucleotide exchange factors, for migration (Nakamuta et al., 2017).  
415 Knockdown of DOCK7 led to unstable movement of the centrosome from the swelling back into  
416 the cell body (Nakamuta et al., 2017), which was attributed to slower migration of olfactory bulb  
417 interneurons devoid of DOCK7. We observed similar migratory deficits and disrupted  
418 centrosome positioning in MGE interneurons treated with JNK inhibitor. Interestingly,

419 knockdown of DOCK7 was previously shown to reduce JNK phosphorylation during Schwann  
420 cell development and migration (Yamauchi et al., 2008; Yamauchi et al., 2011).

421 Furthermore, inactivation of the cell adhesion molecule N-cadherin from MGE interneurons  
422 leads to mislocalization of the centrosome to the rear of the cell body (Luccardini et al., 2013).  
423 JNK-inhibition not only impeded the forward progression of centrosomes into the swelling, but  
424 also led to their unobstructed movement into the trailing process. Interestingly, JNK-inhibition  
425 has been reported to decrease N-cadherin levels and cellular migration of myofibroblasts (De  
426 Wever et al., 2004), which suggests a potential role for JNK signaling in the regulation of N-  
427 cadherin during migration. While mechanisms that control the positioning of the centrosome in  
428 migrating neurons remain to be explored, JNK signaling may help synchronize the activity of cell  
429 adhesion molecules, cytoskeletal proteins, and cytoplasmic machinery that are critically involved  
430 in centrosome motility.

431 Finally, disruptions to ciliary proteins including Arl13b, Kif3a, and IFT88 or to the sonic  
432 hedgehog (Shh) signal transduction pathway all result in cortical interneuron migratory deficits  
433 (Baudoin et al., 2012; Higginbotham et al., 2012). Conditional deletion of Arl13b disrupts the  
434 formation of the primary cilium from the centrosome and the localization/transport of key  
435 receptors known to be critical for interneuron migration, including C-X-C motif chemokine  
436 receptor 4 (Cxcr4), neuregulin-1 receptor (ErbB4), and the Serotonin Receptor 6 (5-Htr6)  
437 (Higginbotham et al., 2012; Riccio et al., 2009; Wang et al., 2011). Dominant negative  
438 knockdown of Kif3a, a molecular motor required for cilium-specific Shh signal transduction,  
439 results in rearward movement of the centrosome of migrating olfactory bulb interneurons  
440 (Matsumoto et al., 2019), suggesting that functional primary cilia are necessary for the proper  
441 localization of the centrosome-cilium complex. Thus, cortical interneurons may require the  
442 function of signal transduction machinery inside the primary cilium for the centrosome-cilium  
443 complex to localize correctly, and to sense and respond to environmental guidance cues that  
444 promote directed migration of interneurons. Additionally, cortical interneurons lacking Arl13b  
445 exhibited leading process branching defects, suggesting that the primary cilium may have  
446 cytoskeletal functions along with its role in transduction of guidance signals (Higginbotham et  
447 al., 2012). Here, we provided evidence that JNK signaling is required for the proper positioning  
448 of the primary cilium during MGE interneuron migration. Future studies are needed to determine  
449 whether inhibition of JNK signaling impairs the localization of centrosome and cilia by disrupting  
450 the function of ciliary proteins such as Kif3a, and whether mislocalized cilia can compromise the  
451 guided migration of cortical interneurons *in vivo*.

452 ***Cellular influences of JNK signaling during cortical interneuron migration***

453 Our work here has shown that the proper cellular mechanics of MGE interneuron migration  
454 depend on the JNK signaling pathway. Loss of JNK function disrupted leading process  
455 branching and nucleokinesis of MGE interneurons and led to significant alterations of their  
456 migratory properties. The requirement of JNK in interneuron migration could be multifactorial,  
457 however, and regulate interneuron migration through intrinsic mechanisms, extrinsic  
458 mechanisms, or both. Since SP600125 treatment inhibits JNK function in all cells of the MGE  
459 explant cortical cell co-culture assay, we cannot exclude the possibility that JNK inhibition  
460 disrupts cell-cell interactions between interneurons and the cortical feeder cells on which they  
461 are grown. To determine whether migrating MGE interneurons have a cell-autonomous  
462 requirement for JNK signaling, we genetically removed *Jnk* from interneurons and cultured them  
463 on WT cortical cells. Although we found migratory deficits in *cTKO* interneurons that were  
464 indicative of an intrinsic function for JNK, the deficits we uncovered were somewhat distinct from  
465 pharmacological experiments, suggesting that there may be additive effects when JNK is  
466 simultaneously removed from both populations of cells. Both pharmacological inhibition and  
467 genetic removal of *Jnk* resulted in consistent leading process branching phenotypes with  
468 decreased growth cone splitting and short-lived interstitial side branches. However, when we  
469 analyzed nucleokinesis, the kinetics of movement were opposite: JNK-inhibited cells completed  
470 nucleokinesis at slower rates, whereas *cTKO* cells completed at faster rates. These data imply  
471 that cortical interneuron migration is dependent on both intrinsic and extrinsic requirements for  
472 JNK signaling, as suggested from recent *in vivo* and *ex vivo* experiments (Myers et al., 2020).  
473 While the exact mechanisms that cortical interneurons utilize to navigate their environment  
474 remain to be fully elucidated, we have found that JNK signaling exerts fine-tune control over cell  
475 biological processes required for proper interneuron migration.

476 ***Conclusions***

477 Using a combination of pharmacological and genetic approaches, we found a novel requirement  
478 for JNK signaling in MGE interneuron leading process branching and nucleokinesis. Our  
479 findings are also the first to implicate the JNK signaling pathway as a key intracellular regulator  
480 of the dynamic positioning of multiple subcellular organelles involved in interneuron migration.  
481 The exact molecular mechanisms controlling JNK signaling in interneuron migration remain to  
482 be determined. Therefore, identifying the upstream activators and downstream targets of JNK

483 signaling will provide further insight into the role of JNK signaling in cortical development and  
484 disease.

## 485 **MATERIALS AND METHODS**

### 486 ***Animals***

487 Animals were housed and cared for by the Office of Laboratory Animal Resources at West  
488 Virginia University (Morgantown, WV, USA). Timed-pregnant dams (day of vaginal plug =  
489 embryonic day 0.5) were euthanized by rapid cervical dislocation at embryonic day 14.5 (E14.5)  
490 and mouse embryos were immediately harvested for tissue culture. CF-1 (Charles River;  
491 Wilmington, MA, US) or C57BL/6J dams (Stock # 000664; The Jackson Laboratory; Bar  
492 Harbour, ME, USA) were crossed to hemizygous *Dlx5/6-Cre-IRES-EGFP* (*Dlx5/6-CIE*; Stenman  
493 et al., 2003) males maintained on a C57BL/6J background to achieve timed pregnancies at  
494 E14.5. To generate JNK triple knockout embryos at E14.5, *Jnk1<sup>fl/fl</sup>*; *Jnk2<sup>-/-</sup>*; *Jnk3<sup>-/-</sup>* dams were  
495 crossed to *Dlx5/6-CIE*; *Jnk1<sup>fl/+</sup>*; *Jnk2<sup>-/-</sup>*; *Jnk3<sup>+/-</sup>* males maintained on a C57BL/6J background. All  
496 animal procedures were performed in accordance to protocols approved by the Institutional  
497 Animal Care and Use Committee at West Virginia University.

### 498 ***MGE explant cortical cell co-culture***

499 8-well chamber coverslip slides (Thermo Fisher 155411) were coated with a solution of poly-L-  
500 lysine (Sigma P5899) and laminin (Sigma L2020) diluted in sterile water (Polleux and Ghosh,  
501 2002), incubated overnight at 37°C with 5% CO<sub>2</sub>, and rinsed with sterile water prior to cell  
502 plating. E14.5 *Dlx5/6-CIE+* and *Dlx5/6-CIE-* embryos were sorted by GFP fluorescence and  
503 dissected in ice-cold complete Hank's Balanced Salt Solution (cHBSS; Tucker et al., 2006).  
504 Cortices were dissected from the negative brains and pooled together for dissociation (Polleux  
505 and Ghosh, 2002). After dissociation, 250µL of cell suspension diluted to 1680cells/µL was  
506 added to each well and allowed to settle for 2 hours. MGE explants were dissected from GFP+  
507 brains and plated on top of cortical cells. Cultures were grown for 24 hours before treatments  
508 and live imaging. Two E14.5 timed-pregnant dams were used for each genetic experiment.  
509 *Dlx5/6-CIE+* and *Dlx5/6-CIE-* embryos were obtained from a *Dlx5/6-Cre-IRES-EGFP* x  
510 C57BL/6J cross, while *cTKO* embryos were obtained by crossing a *Dlx5/6-CIE*; *Jnk1<sup>fl/+</sup>*;  
511 *Jnk2<sup>-/-</sup>*; *Jnk3<sup>+/-</sup>* male to a *Jnk1<sup>fl/fl</sup>*; *Jnk2<sup>-/-</sup>*; *Jnk3<sup>-/-</sup>* dam. MGE explants from *Dlx5/6-CIE+* WT and  
512 *cTKO* embryos were dissected and plated into separate wells containing a monolayer of *Dlx5/6-*  
513 *CIE-* WT cortical cells. Cultures were grown 24 hours prior to live imaging.



## 514 ***Electroporations***

515 Intact ventral forebrains were microdissected from *Dlx5/6-CIE+* embryos and placed on thin  
516 slices of 3% low-melting point agarose (Fisher BP165-25) in cHBSS. Agar slices containing  
517 ventral forebrain tissue were placed onto a positive genepaddles electrode (5x7mm; Harvard  
518 Apparatus Inc #45-0123; Holliston, MA, USA) from a BTX ECM 830 squarewave electroporation  
519 system under a stereo microscope. Endotoxin-free plasmid DNA (1-3 mg/ml) for *Cetn2-mCherry*  
520 and *Arl13b-tdTomato* (gift from Dr. Eva Anton) was injected into the MGE with a picospritzer  
521 (6ms/spritz; General Valve Picospritzer II), a negative genepaddles electrode (5x7mm; Harvard  
522 Apparatus Inc #45-0123) containing a droplet of cHBSS was lowered to the tissue, and  
523 electroporated (5 x 60mV/5ms pulse length/200ms interval pulses). Electroporated MGE  
524 explants were then dissected, plated as above, and grown for 48 hours before imaging.

## 525 ***Live Imaging Experiments***

526 Cultures were treated with pre-warmed 37°C serum-free media containing a 1:1000 dilution of  
527 DMSO for vehicle control or 20 µM SP600125 pan-JNK inhibitor (Enzo Life Sciences BML-  
528 EI305-0010; Farmingdale, NY, USA) and immediately transferred to a Zeiss 710 Confocal  
529 Microscope with stable environmental controls maintained at 37°C with 5% humidified CO<sub>2</sub>.  
530 Multi-position time-lapse z-series were acquired at 10-minute intervals over a 12-hour period  
531 with a 20X Plan-Apo objective (Zeiss; Oberkochen, Germany) for overall migration analysis,  
532 nucleokinesis distance, and swelling distance measurements. For measurements requiring  
533 higher temporal and spatial resolution, such as swelling duration, branch dynamics, and  
534 visualization of subcellular structures in electroporated cells, cultures were imaged using multi-  
535 position time-lapse z-series at 2-2.5 minute intervals over a 4-10 hour period with a 40X C-  
536 apochromat 1.2W M27 objective (Zeiss; Oberkochen, Germany).

## 537 ***Analysis of Live Imaging***

538 4D live imaging movies were analyzed using Imaris 9.5.1 (Bitplane; Zürich, Switzerland)  
539 software. Movies collected at 20X were evaluated in the first 12 h of each recording. Individual  
540 interneurons were tracked for a minimum of 4 h. Tracks were discontinued if a cell remained  
541 stationary for 60 contiguous minutes, or if the tracked cell could no longer be unambiguously  
542 identified. All tracks from each movie were averaged together for dynamic analyses. Cortical  
543 interneurons were tracked using the Spots feature of Imaris to capture migratory speed,  
544 distance, displacement, and track straightness data. Displacement was normalized to the

545 minimum track length of 4 h. Data sets were acquired from a minimum of four experimental  
546 days with genetic experiments containing 5 conditional triple knockout (*cTKO*) embryos.  
547 Pharmacological swelling duration data was obtained from movies collected over 4 experimental  
548 days. Genetic swelling duration was obtained from 3 experimental days with 3 *cTKO* embryos.  
549 The minimum criteria for an interstitial side branch to be included in our analysis was as follows:  
550 the cell had to remain in frame for a minimum of 3 hours, an interstitial side branch had to  
551 persist for a minimum of 10 minutes, and the branch could not become the new leading  
552 process. Two-tailed unpaired Student's *t* tests were used to determine statistical differences  
553 between groups.

554 For electroporation experiments, cultures were imaged at 40X and cells were selected for  
555 centrosome and cilia analyses under the following criteria: the cell remained in frame for a  
556 minimum of 1 hour, the cell displayed low to moderate expression levels of the construct  
557 (without additional expression of aggregated fluorescent protein), and the cell was discernable  
558 from surrounding cells. Centrosome and ciliary distance from the front of the cell body, and  
559 localization were manually tracked and recorded using Imaris software. Two-way Anova  
560 followed by Fisher's LSD post-hoc analyses were performed to determine statistical differences  
561 for organelle distribution analyses (Prism Version 8 using GraphPad Software; San Diego, CA,  
562 USA). Statistical significances were determined by  $\chi^2$  test for the presence of absence of  
563 organelles to a formed swelling over time (Prism Version 8 using GraphPad Software; San  
564 Diego, CA, USA). Two-tailed unpaired Student's *t* tests were used to determine statistical  
565 differences between groups for distance measurements. Confocal micrographs were uniformly  
566 adjusted for levels, brightness, and contrast in Imaris for movie preparation, and Adobe  
567 Photoshop for figure images.

## 568 **ACKNOWLEDGEMENTS**

569 We would like to thank Dr. Amanda Ammer and Dr. Karen Martin for their excellent microscopy  
570 support. Live-imaging experiments were performed in the West Virginia University (WVU)  
571 Imaging Facilities, which were supported by the WVU Cancer Institute, the WVU Health Science  
572 Center Office of Research and Graduate Education, and NIH grants P20RR016440,  
573 P30GM103488, P20GM121322, U54GM104942, P30GM103503, and P20GM103434.

## 574 **COMPETING INTERESTS**

575 No competing interests declared.

576 **AUTHOR CONTRIBUTIONS**

577 Conceptualization: S.E.S. and E.S.T.; Methodology: S.E.S. and E.S.T.; Formal analysis: S.E.S.,  
578 and N.K.C.; Investigation: S.E.S.; Writing: S.E.S., and E.S.T.; Visualization: S.E.S.; Supervision:  
579 E.S.T.; Funding Acquisition: E.S.T.

580 **FUNDING**

581 This work was supported by the National Institutes of Health grant R01NS082262 to EST.

582

583

584

585

586

587

588

589

590

591

592

593

594

595

596

597

598

599

600

601

602

603

604

605

606

607

608 **REFERENCES**

- 609 **Ang, E. S., Haydar, T. F., Gluncic, V. and Rakic, P.** (2003). Four-dimensional  
610 migratory coordinates of GABAergic interneurons in the developing mouse cortex. *J Neurosci*  
611 **23**, 5805-15.
- 612 **Baudoin, J. P., Viou, L., Launay, P. S., Luccardini, C., Espeso Gil, S., Kiyasova, V.,**  
613 **Irinopoulou, T., Alvarez, C., Rio, J. P., Boudier, T. et al.** (2012). Tangentially migrating  
614 neurons assemble a primary cilium that promotes their reorientation to the cortical plate. *Neuron*  
615 **76**, 1108-22.
- 616 **Bellion, A., Baudoin, J. P., Alvarez, C., Bornens, M. and Métin, C.** (2005).  
617 Nucleokinesis in tangentially migrating neurons comprises two alternating phases: forward  
618 migration of the Golgi/centrosome associated with centrosome splitting and myosin contraction  
619 at the rear. *J Neurosci* **25**, 5691-9.
- 620 **Bennett, B. L., Sasaki, D. T., Murray, B. W., O'Leary, E. C., Sakata, S. T., Xu, W.,**  
621 **Leisten, J. C., Motiwala, A., Pierce, S., Satoh, Y. et al.** (2001). SP600125, an  
622 anthrapyrazolone inhibitor of Jun N-terminal kinase. *Proc Natl Acad Sci U S A* **98**, 13681-6.
- 623 **Chang, L. and Karin, M.** (2001). Mammalian MAP kinase signalling cascades. *Nature*  
624 **410**, 37-40.
- 625 **Davis, R. J.** (2000). Signal transduction by the JNK group of MAP kinases. *Cell* **103**,  
626 239-52.
- 627 **De Wever, O., Westbroek, W., Verloes, A., Bloemen, N., Bracke, M., Gespach, C.,**  
628 **Bruyneel, E. and Mareel, M.** (2004). Critical role of N-cadherin in myofibroblast invasion and  
629 migration in vitro stimulated by colon-cancer-cell-derived TGF-beta or wounding. *J Cell Sci* **117**,  
630 4691-703.
- 631 **Friocourt, G., Liu, J. S., Antypa, M., Rakic, S., Walsh, C. A. and Parnavelas, J. G.**  
632 (2007). Both doublecortin and doublecortin-like kinase play a role in cortical interneuron  
633 migration. *J Neurosci* **27**, 3875-83.
- 634 **Gdalyahu, A., Ghosh, I., Levy, T., Sapir, T., Sapoznik, S., Fishler, Y., Azoulai, D. and**  
635 **Reiner, O.** (2004). DCX, a new mediator of the JNK pathway. *EMBO J* **23**, 823-32.
- 636 **Godin, J. D., Thomas, N., Laguesse, S., Malinouskaya, L., Close, P., Malaise, O.,**  
637 **Purnelle, A., Raineteau, O., Campbell, K., Fero, M. et al.** (2012). p27(Kip1) is a microtubule-  
638 associated protein that promotes microtubule polymerization during neuron migration. *Dev Cell*  
639 **23**, 729-44.
- 640 **Higginbotham, H., Eom, T. Y., Mariani, L. E., Bachleda, A., Hirt, J., Gukassyan, V.,**  
641 **Cusack, C. L., Lai, C., Caspary, T. and Anton, E. S.** (2012). Arl13b in primary cilia regulates

642 the migration and placement of interneurons in the developing cerebral cortex. *Dev Cell* **23**,  
643 925-38.

644 **Hildebrandt, F., Benzing, T. and Katsanis, N.** (2011). Ciliopathies. *N Engl J Med* **364**,  
645 1533-43.

646 **Hirai, S., Cui, D. F., Miyata, T., Ogawa, M., Kiyonari, H., Suda, Y., Aizawa, S., Banba,**  
647 **Y. and Ohno, S.** (2006). The c-Jun N-terminal kinase activator dual leucine zipper kinase  
648 regulates axon growth and neuronal migration in the developing cerebral cortex. *J Neurosci* **26**,  
649 11992-2002.

650 **Holmberg, C., Katz, S., Lerdrup, M., Herdegen, T., Jäättelä, M., Aronheim, A. and**  
651 **Kallunki, T.** (2002). A novel specific role for I kappa B kinase complex-associated protein in  
652 cytosolic stress signaling. *J Biol Chem* **277**, 31918-28.

653 **Jin, J., Suzuki, H., Hirai, S., Mikoshiba, K. and Ohshima, T.** (2010). JNK  
654 phosphorylates Ser332 of doublecortin and regulates its function in neurite extension and  
655 neuronal migration. *Dev Neurobiol* **70**, 929-42.

656 **Kappeler, C., Saillour, Y., Baudoin, J. P., Tuy, F. P., Alvarez, C., Houbron, C.,**  
657 **Gaspar, P., Hamard, G., Chelly, J., Métin, C. et al.** (2006). Branching and nucleokinesis  
658 defects in migrating interneurons derived from doublecortin knockout mice. *Hum Mol Genet* **15**,  
659 1387-400.

660 **Kato, M. and Dobyns, W. B.** (2005). X-linked lissencephaly with abnormal genitalia as a  
661 tangential migration disorder causing intractable epilepsy: proposal for a new term,  
662 "interneuronopathy". *J Child Neurol* **20**, 392-7.

663 **Kim, H., Jung, O., Kang, M., Lee, M. S., Jeong, D., Ryu, J., Ko, Y., Choi, Y. J. and**  
664 **Lee, J. W.** (2012). JNK signaling activity regulates cell-cell adhesions via TM4SF5-mediated  
665 p27(Kip1) phosphorylation. *Cancer Lett* **314**, 198-205.

666 **Kojic, M. and Wainwright, B.** (2016). The Many Faces of Elongator in  
667 Neurodevelopment and Disease. *Front Mol Neurosci* **9**, 115.

668 **Kunde, S. A., Rademacher, N., Tzschach, A., Wiedersberg, E., Ullmann, R.,**  
669 **Kalscheuer, V. M. and Shoichet, S. A.** (2013). Characterisation of de novo MAPK10/JNK3  
670 truncation mutations associated with cognitive disorders in two unrelated patients. *Hum Genet*  
671 **132**, 461-71.

672 **Luccardini, C., Hennekinne, L., Viou, L., Yanagida, M., Murakami, F., Kessar, N.,**  
673 **Ma, X., Adelstein, R. S., Mège, R. M. and Métin, C.** (2013). N-cadherin sustains motility and  
674 polarity of future cortical interneurons during tangential migration. *J Neurosci* **33**, 18149-60.

- 675 **Luccardini, C., Leclech, C., Viou, L., Rio, J. P. and Métin, C.** (2015). Cortical  
676 interneurons migrating on a pure substrate of N-cadherin exhibit fast synchronous centrosomal  
677 and nuclear movements and reduced ciliogenesis. *Front Cell Neurosci* **9**, 286.
- 678 **Lysko, D. E., Putt, M. and Golden, J. A.** (2011). SDF1 regulates leading process  
679 branching and speed of migrating interneurons. *J Neurosci* **31**, 1739-45.
- 680 **Lysko, D. E., Putt, M. and Golden, J. A.** (2014). SDF1 reduces interneuron leading  
681 process branching through dual regulation of actin and microtubules. *J Neurosci* **34**, 4941-62.
- 682 **Martini, F. J. and Valdeolillos, M.** (2010). Actomyosin contraction at the cell rear  
683 drives nuclear translocation in migrating cortical interneurons. *J Neurosci* **30**, 8660-70.
- 684 **Martini, F. J., Valiente, M., López Bendo, G., Szabó, G., Moya, F., Valdeolillos,  
685 M. and Marín, O.** (2009). Biased selection of leading process branches mediates chemotaxis  
686 during tangential neuronal migration. *Development* **136**, 41-50.
- 687 **Matsumoto, M., Sawada, M., García-González, D., Herranz-Pérez, V., Ogino, T.,  
688 Bang Nguyen, H., Quynh Thai, T., Narita, K., Kumamoto, N., Ugawa, S. et al.** (2019).  
689 Dynamic Changes in Ultrastructure of the Primary Cilium in Migrating Neuroblasts in the  
690 Postnatal Brain. *J Neurosci* **39**, 9967-9988.
- 691 **McGuire, J. L., Depasquale, E. A., Funk, A. J., O'Donovan, S. M., Hasselfeld, K.,  
692 Marwaha, S., Hammond, J. H., Hartounian, V., Meador-Woodruff, J. H., Meller, J. et al.**  
693 (2017). Abnormalities of signal transduction networks in chronic schizophrenia. *NPJ Schizophr*  
694 **3**, 30.
- 695 **Meechan, D. W., Tucker, E. S., Maynard, T. M. and LaMantia, A. S.** (2012). Cxcr4  
696 regulation of interneuron migration is disrupted in 22q11.2 deletion syndrome. *Proc Natl Acad  
697 Sci U S A* **109**, 18601-6.
- 698 **Miyoshi, G., Hjerling-Leffler, J., Karayannis, T., Sousa, V. H., Butt, S. J., Battiste, J.,  
699 Johnson, J. E., Machold, R. P. and Fishell, G.** (2010). Genetic fate mapping reveals that the  
700 caudal ganglionic eminence produces a large and diverse population of superficial cortical  
701 interneurons. *J Neurosci* **30**, 1582-94.
- 702 **Moya, F. and Valdeolillos, M.** (2004). Polarized increase of calcium and  
703 nucleokinesis in tangentially migrating neurons. *Cereb Cortex* **14**, 610-8.
- 704 **Myers, A. K., Cunningham, J. G., Smith, S. E., Snow, J. P., Smoot, C. A. and  
705 Tucker, E. S.** (2020). JNK signaling is required for proper tangential migration and laminar  
706 allocation of cortical interneurons. *Development* **147**, Doi: 10.1242/dev.180646.

707 **Myers, A. K., Meechan, D. W., Adney, D. R. and Tucker, E. S.** (2014). Cortical  
708 interneurons require Jnk1 to enter and navigate the developing cerebral cortex. *J Neurosci* **34**,  
709 7787-801.

710 **Nadarajah, B., Alifragis, P., Wong, R. O. and Parnavelas, J. G.** (2003). Neuronal  
711 migration in the developing cerebral cortex: observations based on real-time imaging. *Cereb*  
712 *Cortex* **13**, 607-11.

713 **Nakamuta, S., Yang, Y. T., Wang, C. L., Gallo, N. B., Yu, J. R., Tai, Y. and Van Aelst,**  
714 **L.** (2017). Dual role for DOCK7 in tangential migration of interneuron precursors in the postnatal  
715 forebrain. *J Cell Biol* **216**, 4313-4330.

716 **Nery, S., Fishell, G. and Corbin, J. G.** (2002). The caudal ganglionic eminence is a  
717 source of distinct cortical and subcortical cell populations. *Nat Neurosci* **5**, 1279-87.

718 **Peyre, E., Silva, C. G. and Nguyen, L.** (2015). Crosstalk between intracellular and  
719 extracellular signals regulating interneuron production, migration and integration into the cortex.  
720 *Front Cell Neurosci* **9**, 129.

721 **Polleux, F. and Ghosh, A.** (2002). The slice overlay assay: a versatile tool to study the  
722 influence of extracellular signals on neuronal development. *Sci STKE* **2002**, pl9.

723 **Polleux, F., Whitford, K. L., Dijkhuizen, P. A., Vitalis, T. and Ghosh, A.** (2002).  
724 Control of cortical interneuron migration by neurotrophins and PI3-kinase signaling.  
725 *Development* **129**, 3147-60.

726 **Riccio, O., Potter, G., Walzer, C., Vallet, P., Szabó, G., Vutskits, L., Kiss, J. Z. and**  
727 **Dayer, A. G.** (2009). Excess of serotonin affects embryonic interneuron migration through  
728 activation of the serotonin receptor 6. *Mol Psychiatry* **14**, 280-90.

729 **Silva, C. G., Peyre, E., Adhikari, M. H., Tielens, S., Tanco, S., Van Damme, P.,**  
730 **Magno, L., Krusy, N., Agirman, G., Magiera, M. M. et al.** (2018). Cell-Intrinsic Control of  
731 Interneuron Migration Drives Cortical Morphogenesis. *Cell* **172**, 1063-1078.e19.

732 **Solecki, D. J., Trivedi, N., Govek, E. E., Kerekes, R. A., Gleason, S. S. and Hatten,**  
733 **M. E.** (2009). Myosin II motors and F-actin dynamics drive the coordinated movement of the  
734 centrosome and soma during CNS glial-guided neuronal migration. *Neuron* **63**, 63-80.

735 **Spillane, M., Ketschek, A., Jones, S. L., Korobova, F., Marsick, B., Lanier, L.,**  
736 **Svitkina, T. and Gallo, G.** (2011). The actin nucleating Arp2/3 complex contributes to the  
737 formation of axonal filopodia and branches through the regulation of actin patch precursors to  
738 filopodia. *Dev Neurobiol* **71**, 747-58.

739           **Stenman, J., Toresson, H. and Campbell, K.** (2003). Identification of two distinct  
740 progenitor populations in the lateral ganglionic eminence: implications for striatal and olfactory  
741 bulb neurogenesis. *J Neurosci* **23**, 167-74.

742           **Tielens, S., Huysseune, S., Godin, J. D., Chariot, A., Malgrange, B. and Nguyen, L.**  
743 (2016). Elongator controls cortical interneuron migration by regulating actomyosin dynamics.  
744 *Cell Res* **26**, 1131-1148.

745           **Tsai, L. H. and Gleeson, J. G.** (2005). Nucleokinesis in neuronal migration. *Neuron* **46**,  
746 383-8.

747           **Tucker, E. S., Polleux, F. and LaMantia, A. S.** (2006). Position and time specify the  
748 migration of a pioneering population of olfactory bulb interneurons. *Dev Biol* **297**, 387-401.

749           **Umeshima, H., Hirano, T. and Kengaku, M.** (2007). Microtubule-based nuclear  
750 movement occurs independently of centrosome positioning in migrating neurons. *Proc Natl*  
751 *Acad Sci U S A* **104**, 16182-7.

752           **Volk, D. W., Chitrapu, A., Edelson, J. R. and Lewis, D. A.** (2015). Chemokine  
753 receptors and cortical interneuron dysfunction in schizophrenia. *Schizophr Res* **167**, 12-7.

754           **Wang, X., Nadarajah, B., Robinson, A. C., McColl, B. W., Jin, J. W., Dajas-Bailador,**  
755 **F., Boot-Handford, R. P. and Tournier, C.** (2007). Targeted deletion of the mitogen-activated  
756 protein kinase kinase 4 gene in the nervous system causes severe brain developmental defects  
757 and premature death. *Mol Cell Biol* **27**, 7935-46.

758           **Wang, Y., Li, G., Stanco, A., Long, J. E., Crawford, D., Potter, G. B., Pleasure, S. J.,**  
759 **Behrens, T. and Rubenstein, J. L.** (2011). CXCR4 and CXCR7 have distinct functions in  
760 regulating interneuron migration. *Neuron* **69**, 61-76.

761           **Westerlund, N., Zdrojewska, J., Padzik, A., Komulainen, E., Björkblom, B.,**  
762 **Rannikko, E., Tararuk, T., Garcia-Frigola, C., Sandholm, J., Nguyen, L. et al.** (2011).  
763 Phosphorylation of SCG10/stathmin-2 determines multipolar stage exit and neuronal migration  
764 rate. *Nat Neurosci* **14**, 305-13.

765           **Wichterle, H., Garcia-Verdugo, J. M., Herrera, D. G. and Alvarez-Buylla, A.** (1999).  
766 Young neurons from medial ganglionic eminence disperse in adult and embryonic brain. *Nat*  
767 *Neurosci* **2**, 461-6.

768           **Xu, Q., Cobos, I., De La Cruz, E., Rubenstein, J. L. and Anderson, S. A.** (2004).  
769 Origins of cortical interneuron subtypes. *J Neurosci* **24**, 2612-22.

770           **Yamasaki, T., Kawasaki, H., Arakawa, S., Shimizu, K., Shimizu, S., Reiner, O.,**  
771 **Okano, H., Nishina, S., Azuma, N., Penninger, J. M. et al.** (2011). Stress-activated protein



772 kinase MKK7 regulates axon elongation in the developing cerebral cortex. *J Neurosci* **31**,  
773 16872-83.

774 **Yamauchi, J., Miyamoto, Y., Chan, J. R. and Tanoue, A.** (2008). ErbB2 directly  
775 activates the exchange factor Dock7 to promote Schwann cell migration. *J Cell Biol* **181**, 351-  
776 65.

777 **Yamauchi, J., Miyamoto, Y., Hamasaki, H., Sanbe, A., Kusakawa, S., Nakamura, A.,**  
778 **Tsumura, H., Maeda, M., Nemoto, N., Kawahara, K. et al.** (2011). The atypical Guanine-  
779 nucleotide exchange factor, dock7, negatively regulates schwann cell differentiation and  
780 myelination. *J Neurosci* **31**, 12579-92.

781 **Yanagida, M., Miyoshi, R., Toyokuni, R., Zhu, Y. and Murakami, F.** (2012). Dynamics  
782 of the leading process, nucleus, and Golgi apparatus of migrating cortical interneurons in living  
783 mouse embryos. *Proc Natl Acad Sci U S A* **109**, 16737-42.

784 **Zhang, F., Yu, J., Yang, T., Xu, D., Chi, Z., Xia, Y. and Xu, Z.** (2016). A Novel c-Jun N-  
785 terminal Kinase (JNK) Signaling Complex Involved in Neuronal Migration during Brain  
786 Development. *J Biol Chem* **291**, 11466-75.

787

788

789

790

791

792

793

794

795

796

797

798

799

800 **FIGURE LEGENDS**

801 **Figure 1. JNK signaling regulates the dynamic migratory properties of MGE interneurons.**

802 A. Schematic diagram of MGE explant cortical cell co-culture assay with pharmacological  
803 inhibition of JNK signaling. B-C. Individual cell tracks (pseudo-colored by time) from four  
804 interneurons in control (B) or 20 $\mu$ M SP600125 (C) treated cultures imaged live for 12 hours. D-  
805 G. Quantification of interneuron migratory properties revealed significant disruptions in migration  
806 speed (D), speed variation (E), and displacement (F), but not straightness (G) during JNK  
807 inhibition. For each condition, 10 cells were tracked from  $n = 11$  movies (110 cells/condition)  
808 obtained over 4 experimental days. Data are mean $\pm$ s.e.m. \*\*\*\* $p < 0.0001$ , \*\*\* $p < 0.001$ , Student's  
809  $t$ -test. Time in hours. Scale bar: 50  $\mu$ m.

810 **Figure 2. Migrating MGE interneurons require intact JNK signaling for proper leading**

811 **process branching.** A-B. Time series depicting growth cone (GC) splitting from control (A) or  
812 JNK-inhibited (B) MGE interneurons. Closed arrowhead = GC, open arrowhead = new GC  
813 branch. C. Quantification of leading process length.  $n=10$  cells were measured from 8  
814 movies/condition obtained over 4 experimental days. D. Quantification of GC splitting frequency.  
815  $n=17$  control cells from 8 movies and  $n=19$  SP600125 cells from 10 movies were measured. E-  
816 F. Interstitial side branching from control (E) or JNK-inhibited (F) interneurons. Closed  
817 arrowhead = new side branch. G. Quantification of interstitial side branch frequency of control  
818 and SP600125 treated interneurons.  $n=17$  control cells from 8 movies;  $n=19$  SP600125 cells  
819 from 10 movies. H. Quantification of interstitial side branch duration in control and JNK-inhibited  
820 conditions.  $n=52$  branches from 14 control cells and 18 SP600125 cells were measured from 10  
821 movies/condition. All branching data were from movies obtained over 5 experimental days. Data  
822 are mean $\pm$ s.e.m. \* $p < 0.05$ , Student's  $t$ -test. Time in minutes. Scale bar: 15  $\mu$ m.

823 **Figure 3. Pharmacological inhibition of JNK signaling impairs nucleokinesis in migrating**

824 **MGE interneurons.** A-B. Time series of a control (A) and SP600125-treated (B) interneuron  
825 undergoing a single cycle of nucleokinesis. Closed arrowhead = leading process swelling,  $n =$   
826 nucleus. C-E. Cortical interneurons treated with JNK inhibitor have significantly shorter somal  
827 translocation distances (C), decreased frequency of nucleokinesis (D), and increased pause  
828 duration (E) compared to controls. C. Cartoon showing how the distance ( $d$ ) that an interneuron  
829 cell body translocates over time was measured. In each condition, 50 cells were measured from  
830  $n=10$  movies obtained over 4 experimental days. F. Cartoon showing how the distance ( $d$ ) that  
831 a swelling extends from a cell body was measured. JNK-inhibited cells display significantly

832 decreased distance of swelling extension. G. Swelling duration is significantly increased in JNK-  
833 inhibited interneurons. 43 control cells were measured from n=10 control movies and 53 treated  
834 cells were measured from n=6 SP600125 movies, each obtained over 4 experimental days. H.  
835 Histogram showing nuclear translocation over time for a single cell in each condition. Distance  
836 traveled between two points is plotted and every movement above 5  $\mu\text{m}$  (grey dashed line) is  
837 considered to be a nucleokinesis event. Data are mean $\pm$ s.e.m. \*\*\*\*p<0.0001, \*\*\*p<0.001,  
838 \*\*p<0.01, Student's *t*-test. Time in minutes. Scale bar: 15  $\mu\text{m}$ .

839 **Figure 4. Genetic removal of JNK signaling impairs migratory properties and leading**  
840 **process dynamics of MGE interneurons.** A. Diagram of MGE explant assay with *Dlx5/6-CIE+*  
841 wild-type (WT) or JNK conditional triple knockout (*cTKO*) explants cultured on WT cortical  
842 feeder-cells. B-C. Four individual cell tracks (pseudo-colored by time) from WT or *cTKO*  
843 interneurons imaged live for 12 hours. D-G. Quantification of migratory properties reveals  
844 significant disruptions in migratory speed, speed variation, displacement, and straightness  
845 between control and *cTKO* interneurons. 120 WT cells were measured from n=12 control  
846 movies and 130 *cTKO* cells were measured from n=13 *cTKO* movies, each obtained over 4  
847 experimental days. H-I. *cTKO* interneurons have significantly decreased growth cone split  
848 frequency (H) without changes in interstitial side branch frequency (I). n=11 WT cells and n=12  
849 *cTKO* cells measured from 6 movies/condition collected over 4 experimental days. J. Side  
850 branches from *cTKO* interneurons are significantly shorter-lived than controls. n=34 branches  
851 were measured from 10 WT cells and n=28 branches were measured from 10 *cTKO* cells  
852 recorded from 6 movies/condition obtained over 4 experimental days. Data are mean $\pm$ s.e.m.  
853 \*p<0.05, Student's *t*-test. Time in hours. Scale bar: 50  $\mu\text{m}$ .

854 **Figure 5. Genetic removal of *Jnk* disrupts nucleokinesis in migrating MGE interneurons.**  
855 A. WT cortical interneuron undergoing a single nucleokinesis event. B. *cTKO* cortical  
856 interneuron completing two nucleokinesis events over the same interval of time. Closed  
857 arrowhead = leading process swelling, n = nucleus. C-E. *cTKO* interneurons have significantly  
858 decreased translocation distance (C), increased translocation frequency (D), and decreased  
859 pause duration (E) compared to WT interneurons. In each condition, 50 cells were measured  
860 from n=10 movies obtained over 4 experimental days. F. *cTKO* interneurons have decreased  
861 swelling duration compared to WT interneurons. 37 WT cells were measured from n=6 WT  
862 movies and 38 *cTKO* cells were measured from n=6 *cTKO* movies, each obtained over 4  
863 experimental days. Data are mean $\pm$ s.e.m. \*\*\*p<0.001, \*\*p<0.01, \*p<0.05, Student's *t*-test. Time  
864 in minutes. Scale bar: 15  $\mu\text{m}$ .

865 **Figure 6. The subcellular localization of the centrosome is disrupted during JNK**  
866 **inhibition.** A. Diagram depicting *ex vivo* electroporation of MGE tissue and subsequent culture  
867 of MGE explants on cortical feeder cells. B. An interneuron expressing a fluorescently tagged  
868 centrosome protein (Centrin2; Cetn2-mCherry) shows translocation of the centrosome into the  
869 cytoplasmic swelling prior to nucleokinesis in control conditions. C. A Cetn2-mCherry  
870 expressing interneuron treated with SP600125 shows aberrant rearward movement of the  
871 centrosome into the trailing process. Arrowhead = Cetn2-mCherry. D. Quantification of  
872 centrosome distribution over time (Two-way ANOVA:  $F_{(2,114)} = 13.82$ ;  $P < 0.0001$ ). Error bars  
873 represent mean  $\pm$  s.e.m., post-hoc by Fisher's LSD \*\*\* $p < 0.001$ , \*\* $p < 0.01$ , \* $p < 0.05$ . E.  
874 Quantification of centrosome presence in a formed swelling over time ( $\chi^2$  test; \*\*\*\* $P < 0.0001$ ). F.  
875 Average maximum distance the centrosome traveled from the soma front (Student's *t*-test;  
876 \*\*\*\* $p < 0.0001$ , \*\*\* $p < 0.001$ , \*\* $p < 0.01$ , \* $p < 0.05$ ). In each condition,  $n = 20$  cells were measured  
877 from 11 movies obtained over 5 experimental days. Data are mean  $\pm$  s.e.m. Time in minutes.  
878 Scale bar: 15  $\mu$ m.

879 **Figure 7. Primary cilium localization is disrupted during JNK inhibition.** A. An interneuron  
880 expressing a fluorescently tagged primary ciliary marker (Arl13b-tdTomato) shows translocation  
881 of the primary cilium into the cytoplasmic swelling prior to nucleokinesis in control conditions. B.  
882 An interneuron expressing Arl13b-tdTomato shows aberrant rearward movement of the primary  
883 cilium into the trailing process when treated with SP600125. Arrowhead = Arl13b-tdTomato. C.  
884 Quantification of primary cilium distribution over time (Two-way ANOVA:  $F_{(2,114)} = 12.13$ ;  
885  $P < 0.0001$ ). Error bars represent mean  $\pm$  s.e.m., post-hoc by Fisher's LSD \*\*\* $p < 0.001$ , \*\* $p < 0.01$ ,  
886 \* $p < 0.05$ . D. Quantification of primary cilium presence in a formed swelling over time ( $\chi^2$  test;  
887 \*\*\*\* $P < 0.0001$ ). E. Average maximum distance the primary cilium traveled from the soma front  
888 (Student's *t*-test; \*\* $p < 0.01$ ). In each condition,  $n = 20$  cells were measured from 15 movies  
889 obtained over 6 experimental days. Data are mean  $\pm$  s.e.m. Time in minutes. Scale bar: 15  $\mu$ m.

890

891

892

893

894

Figure 1

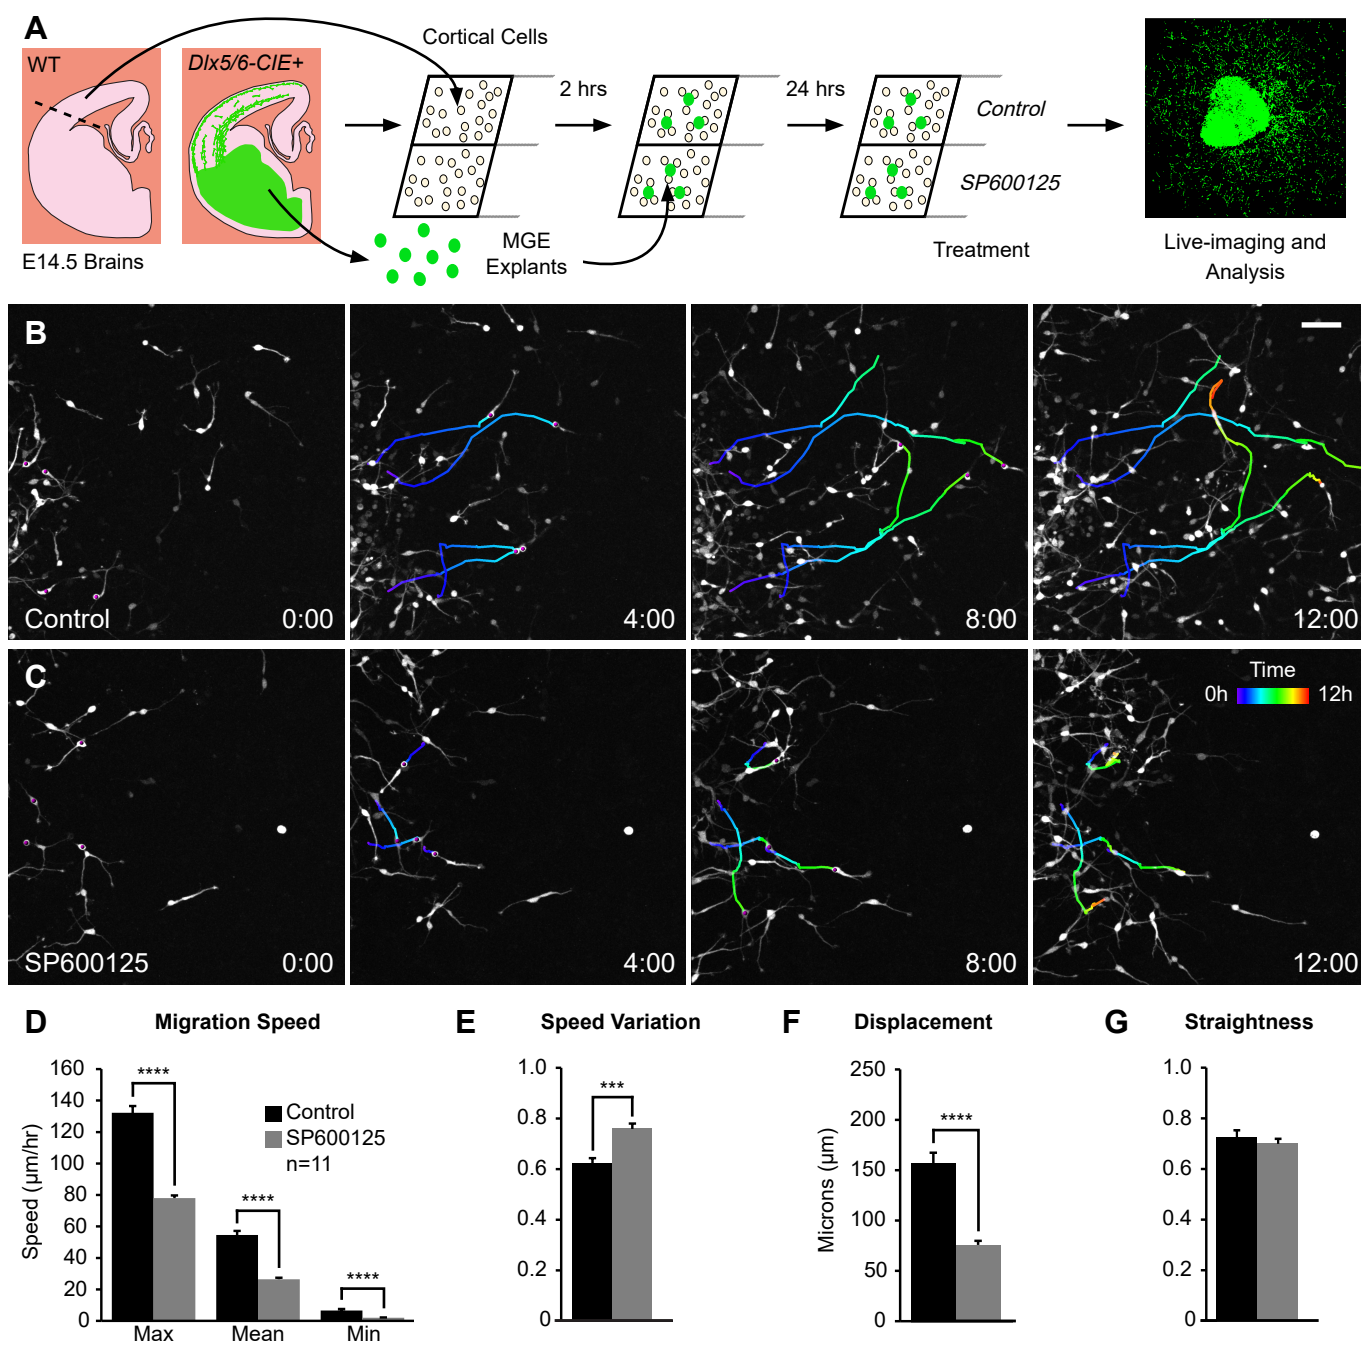

Figure 2

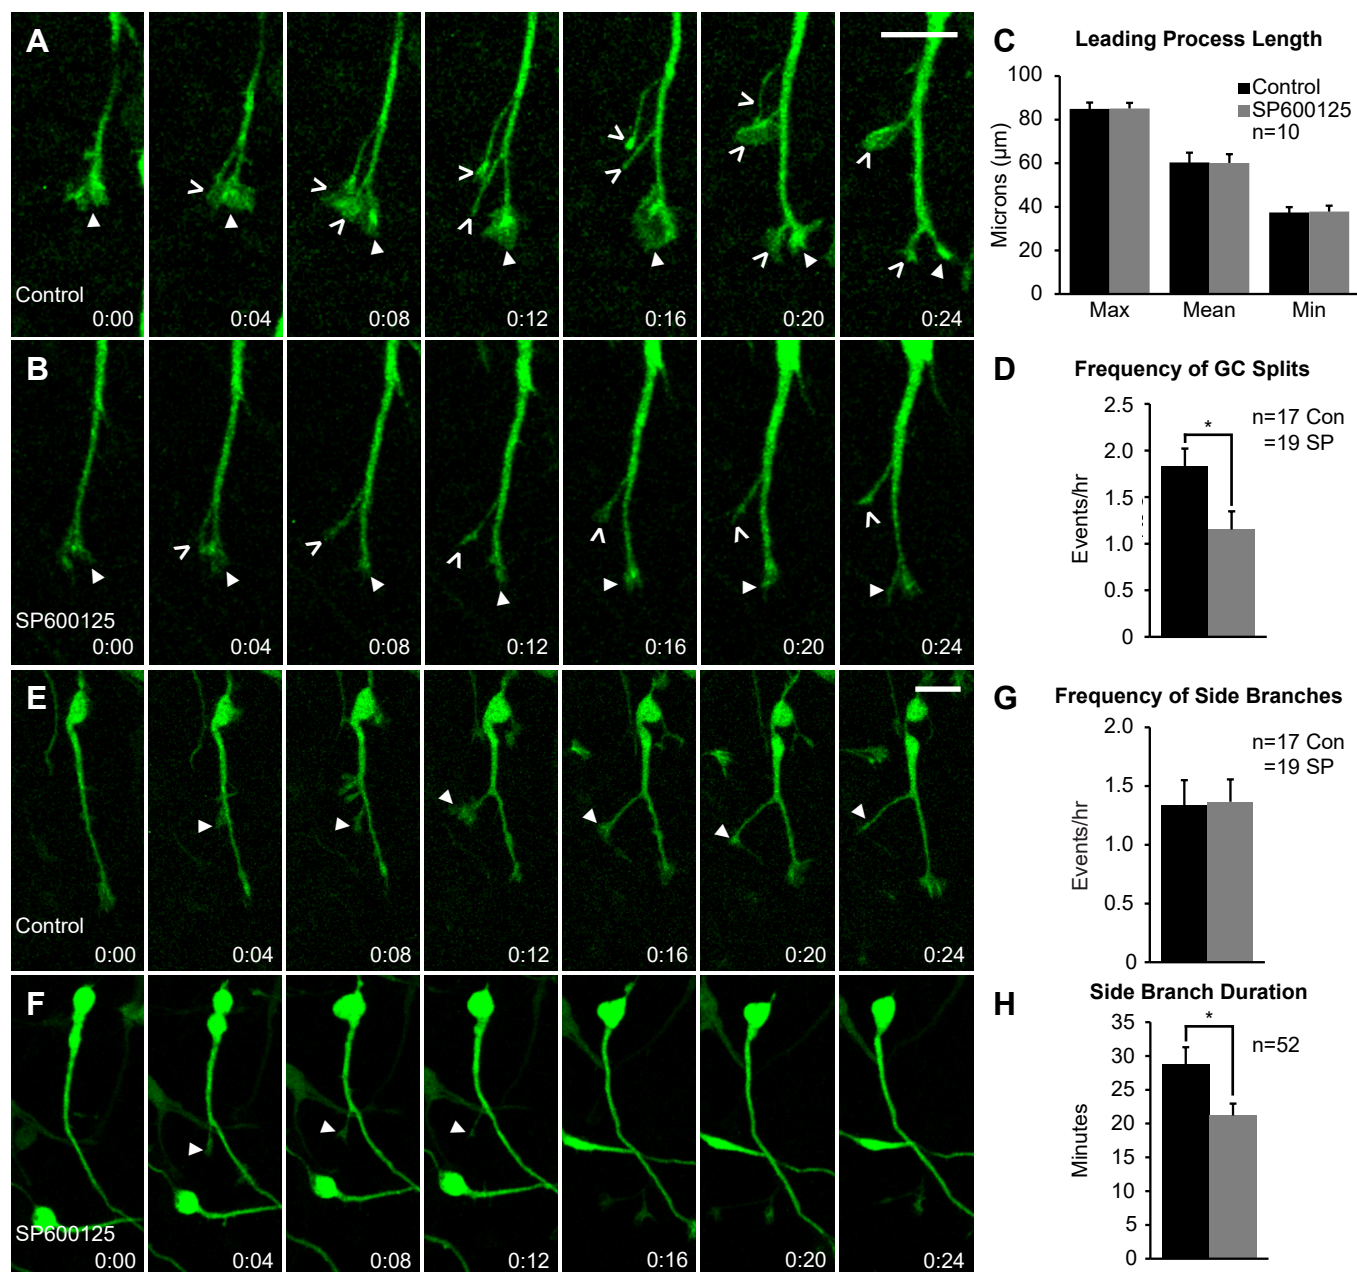

Figure 3

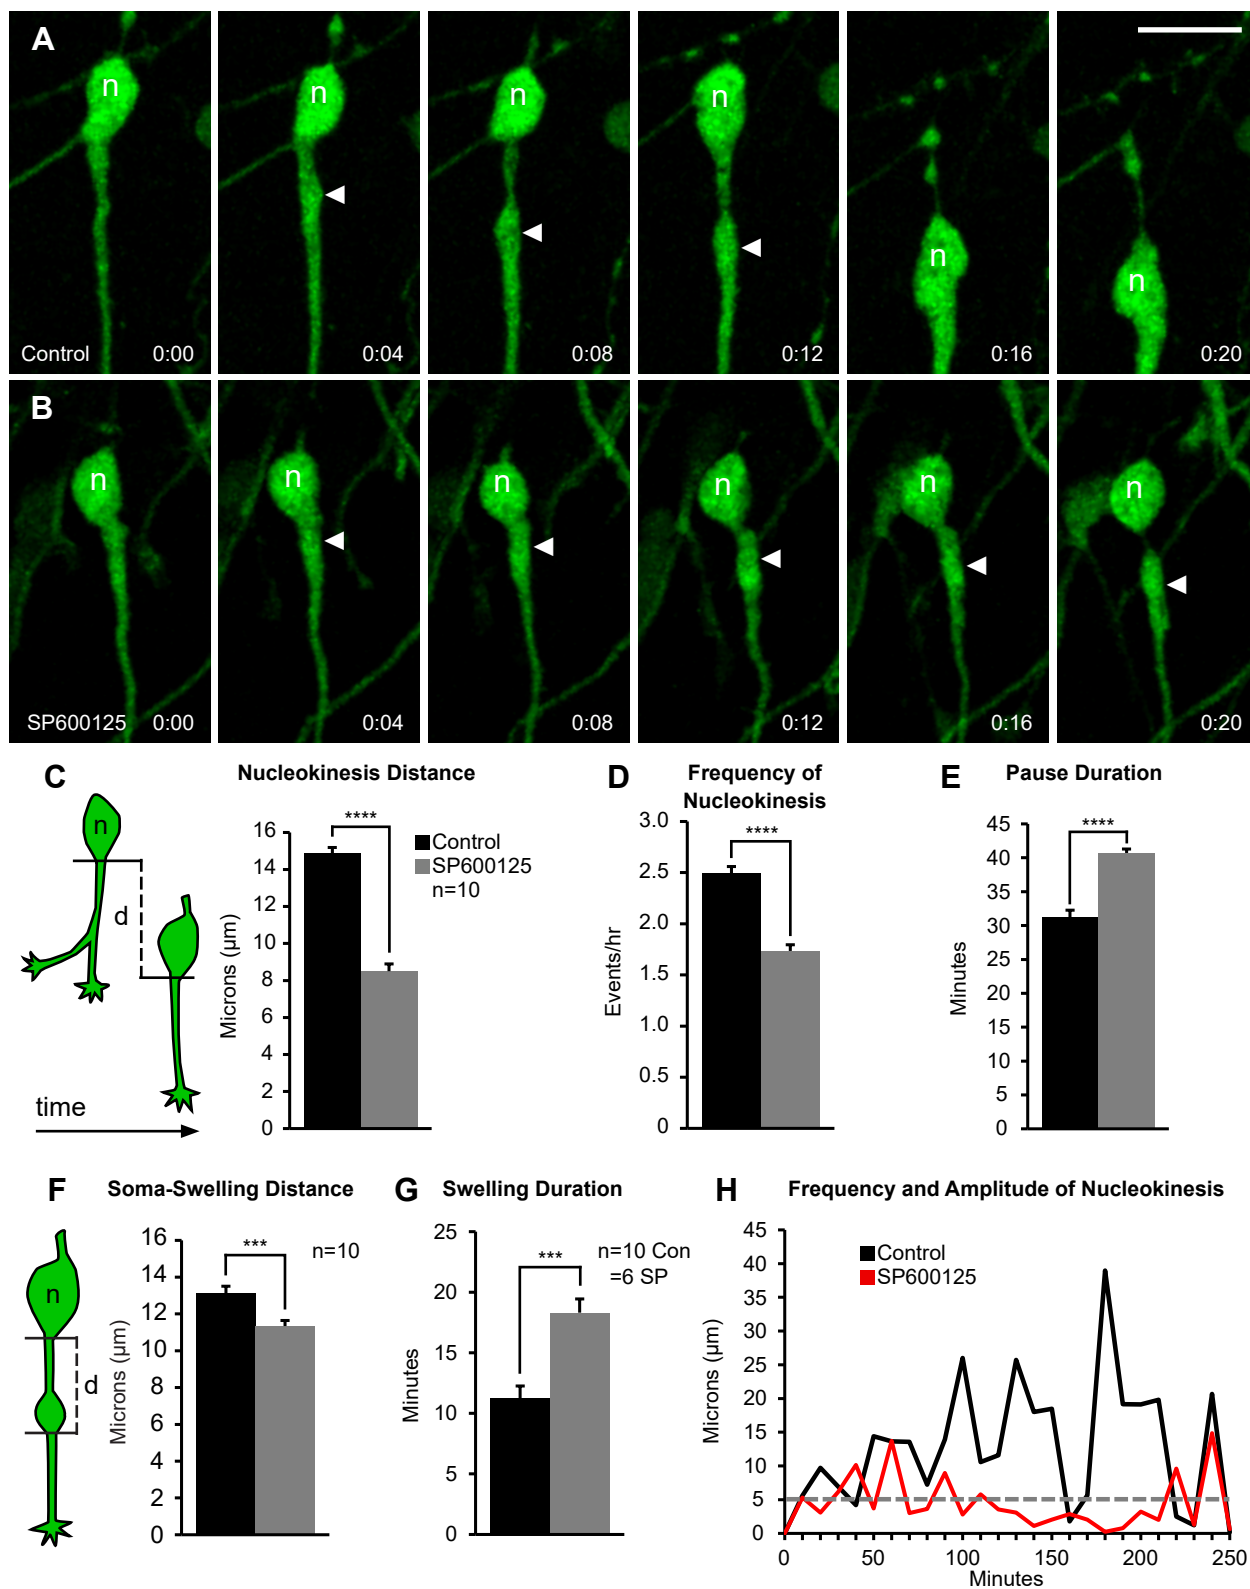

Figure 4

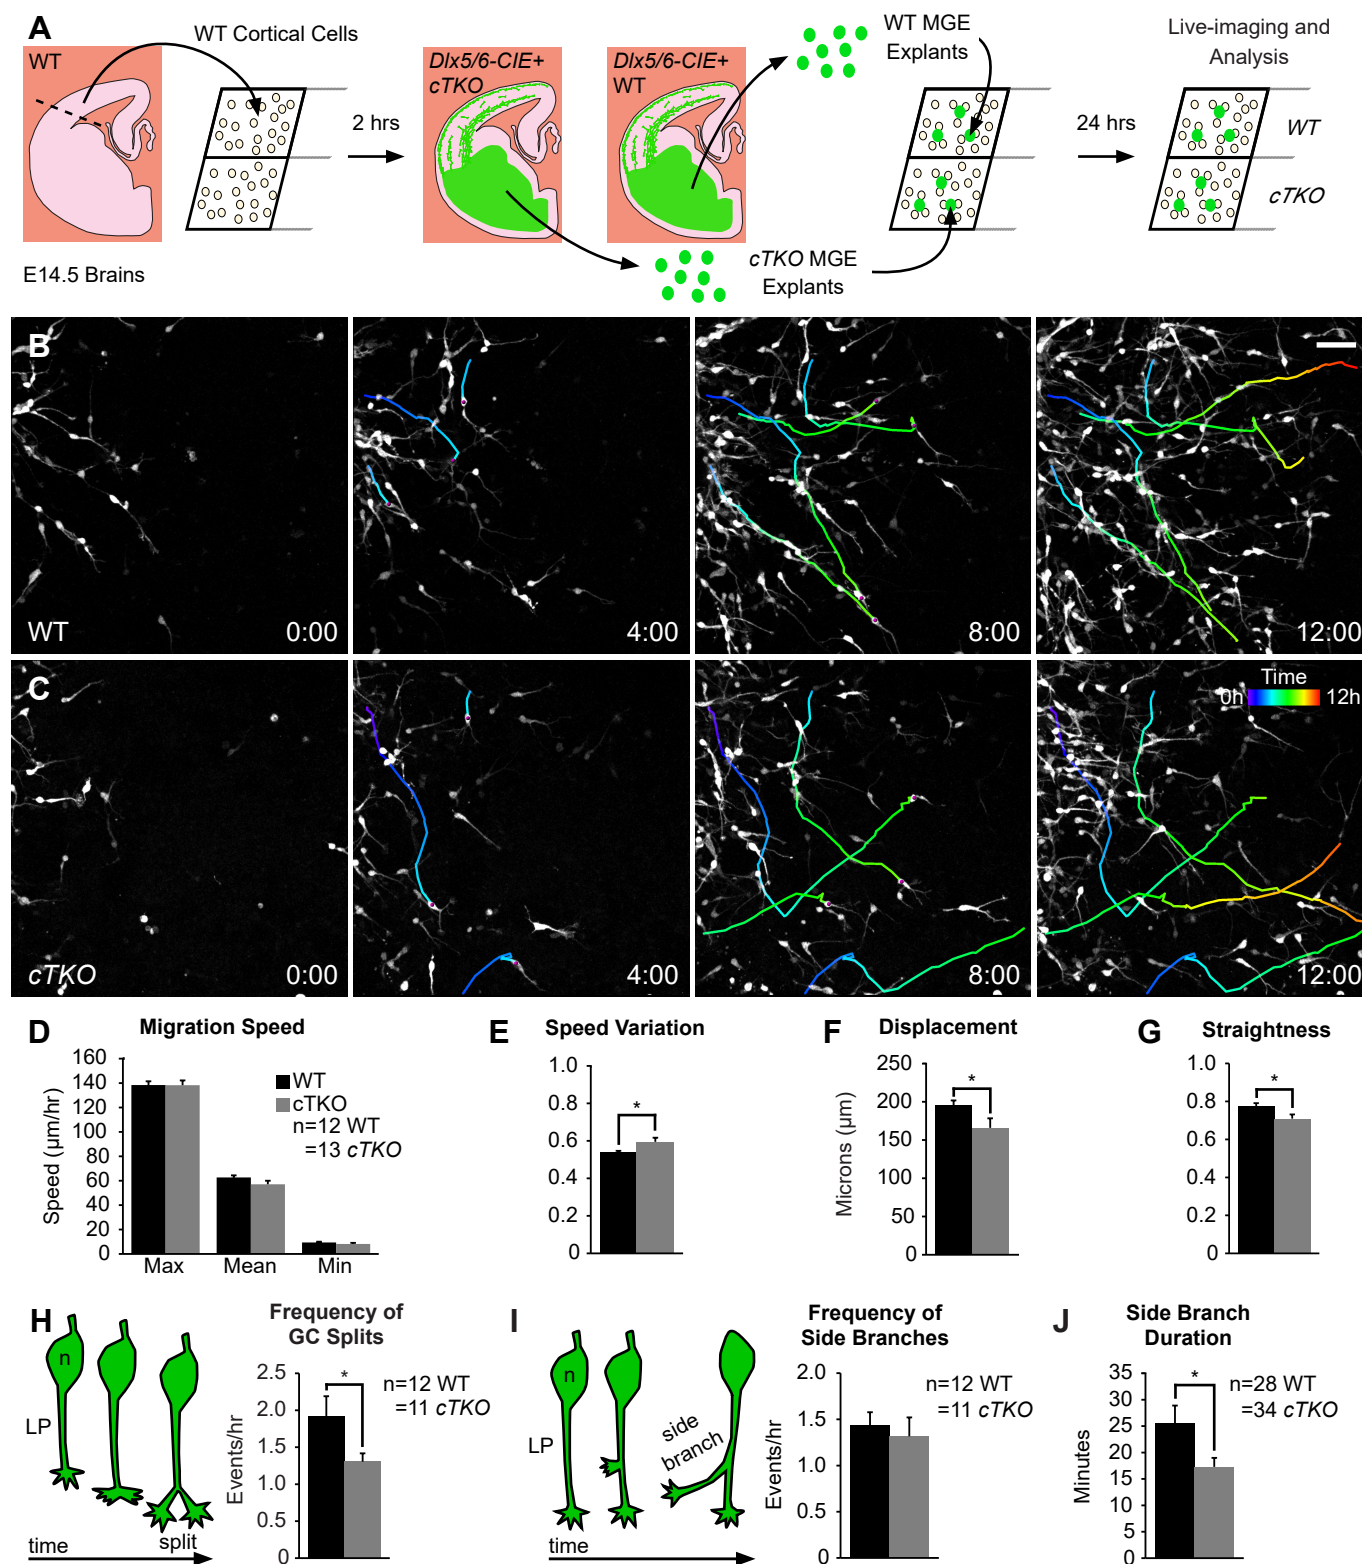



Figure 5

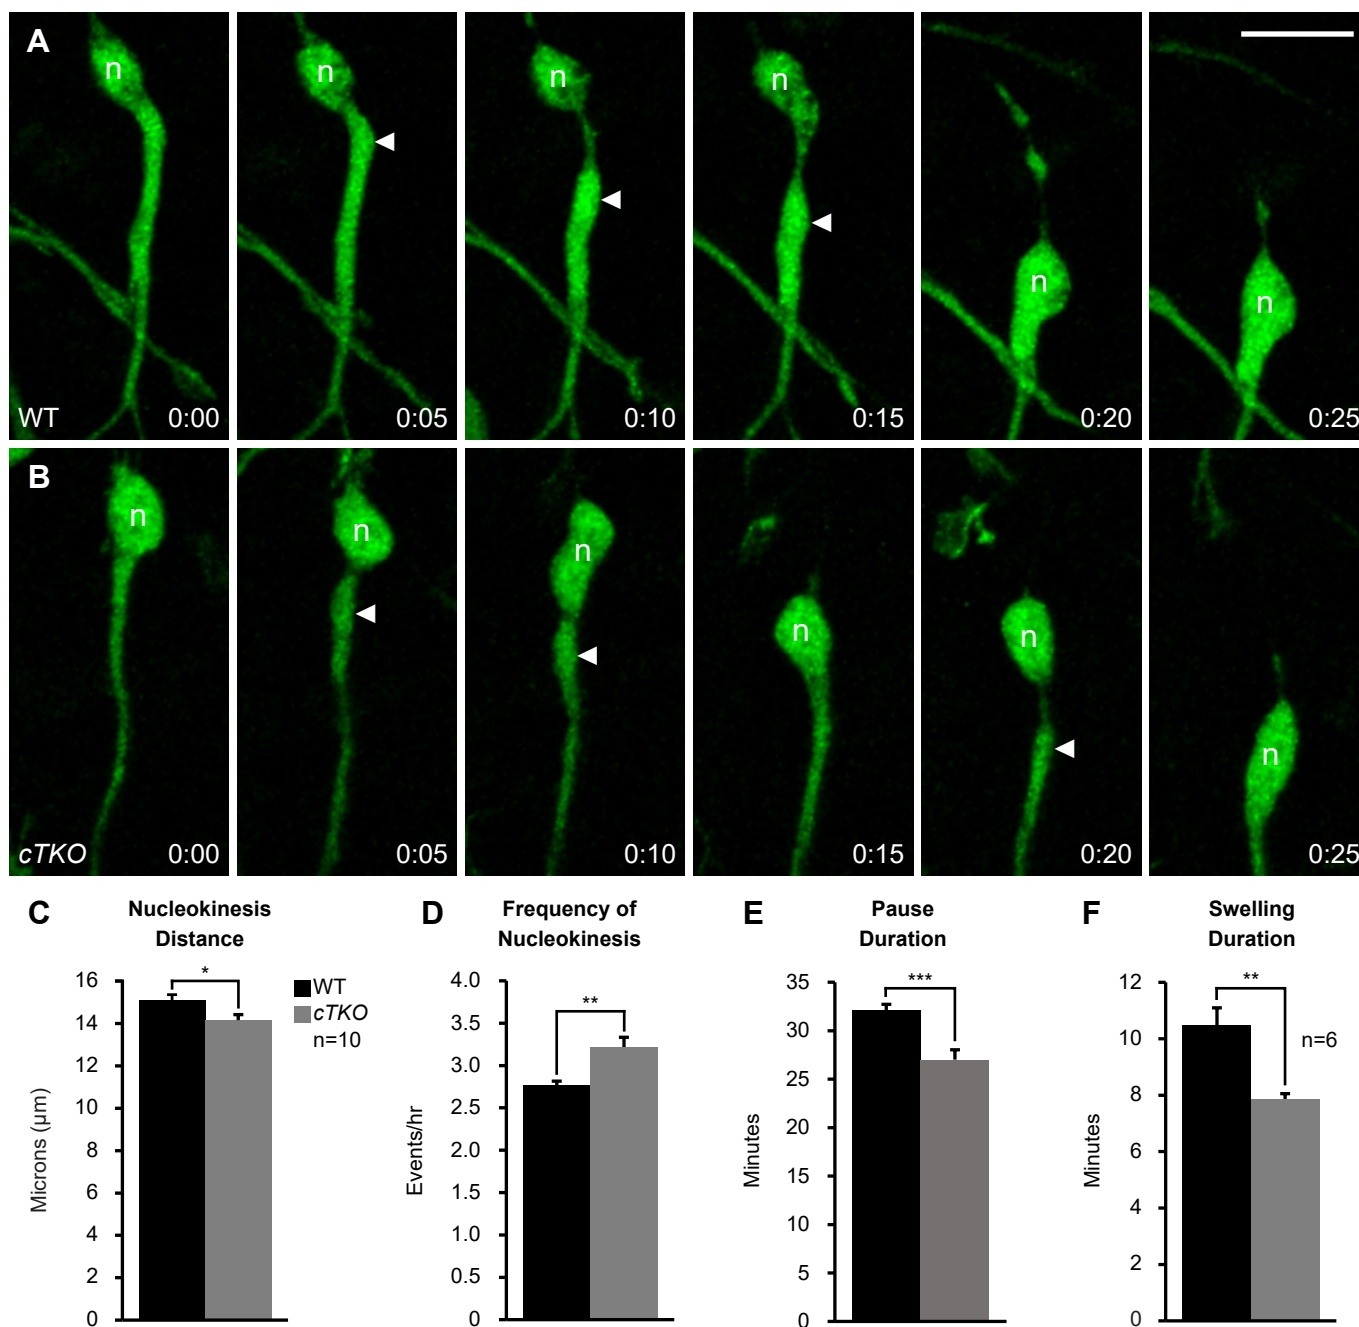

Figure 6

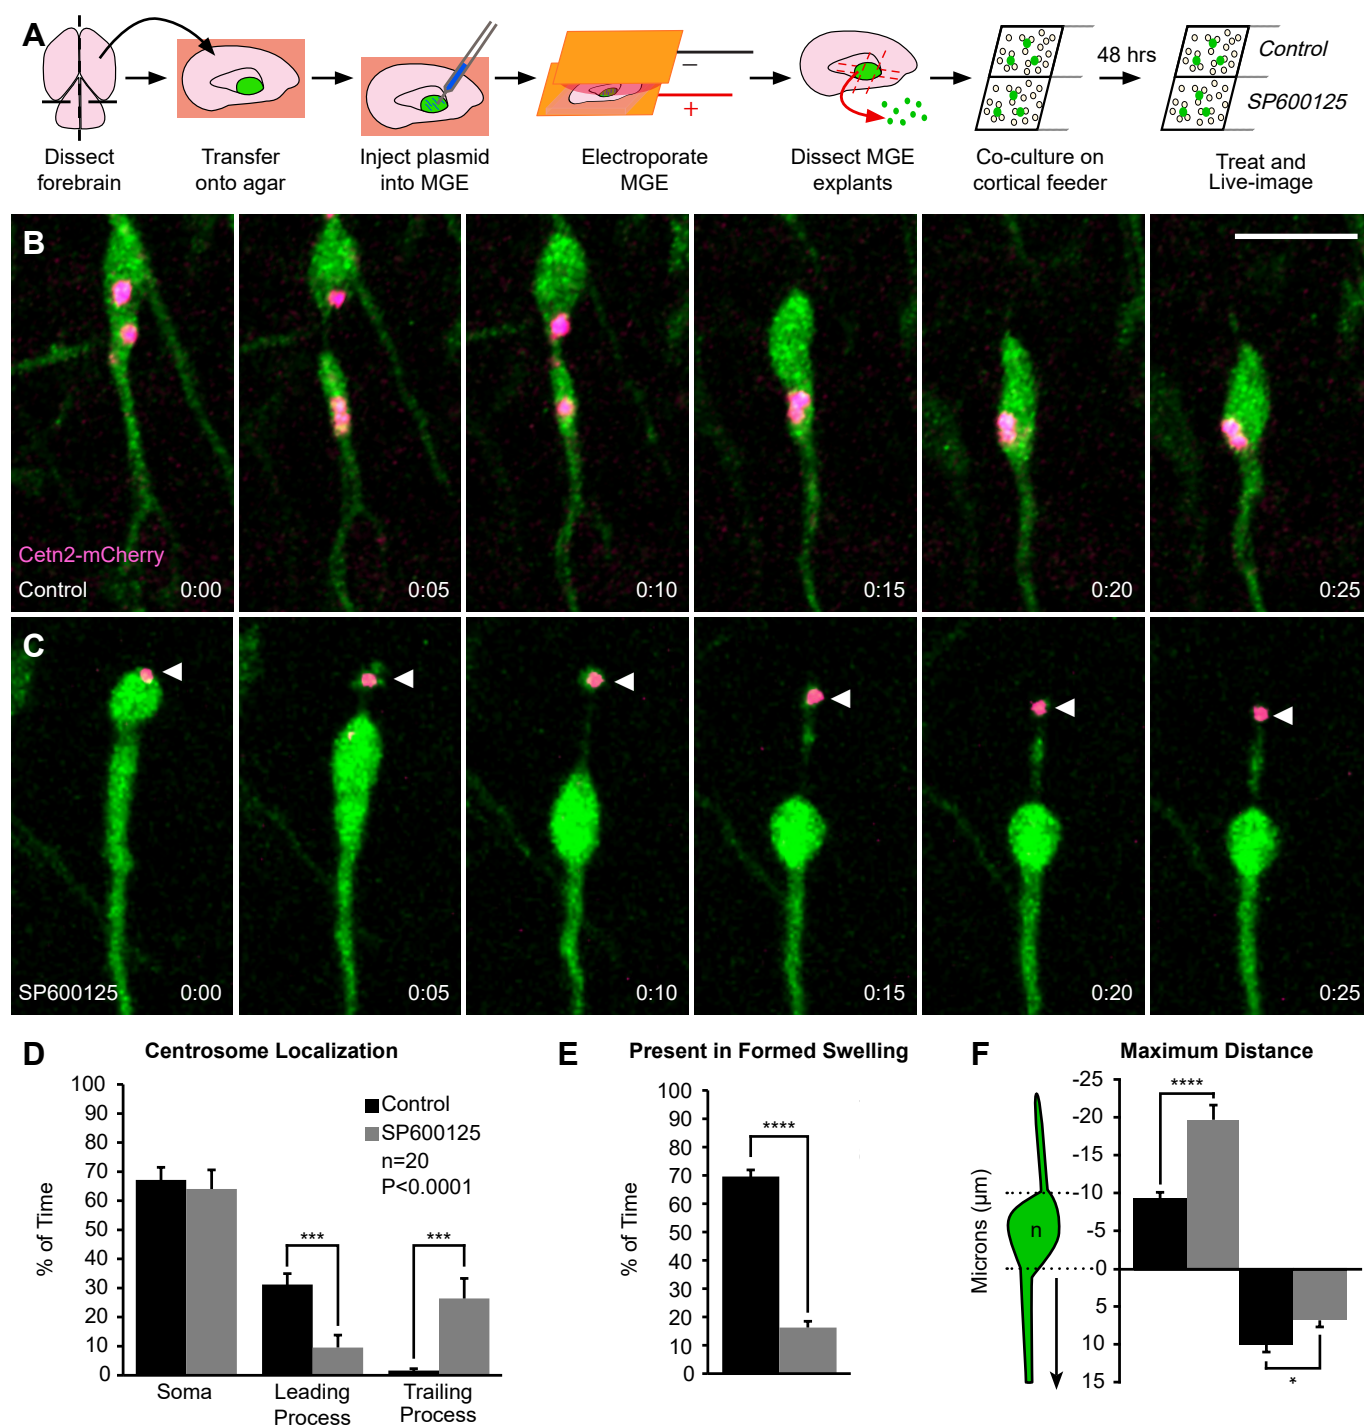

Figure 7

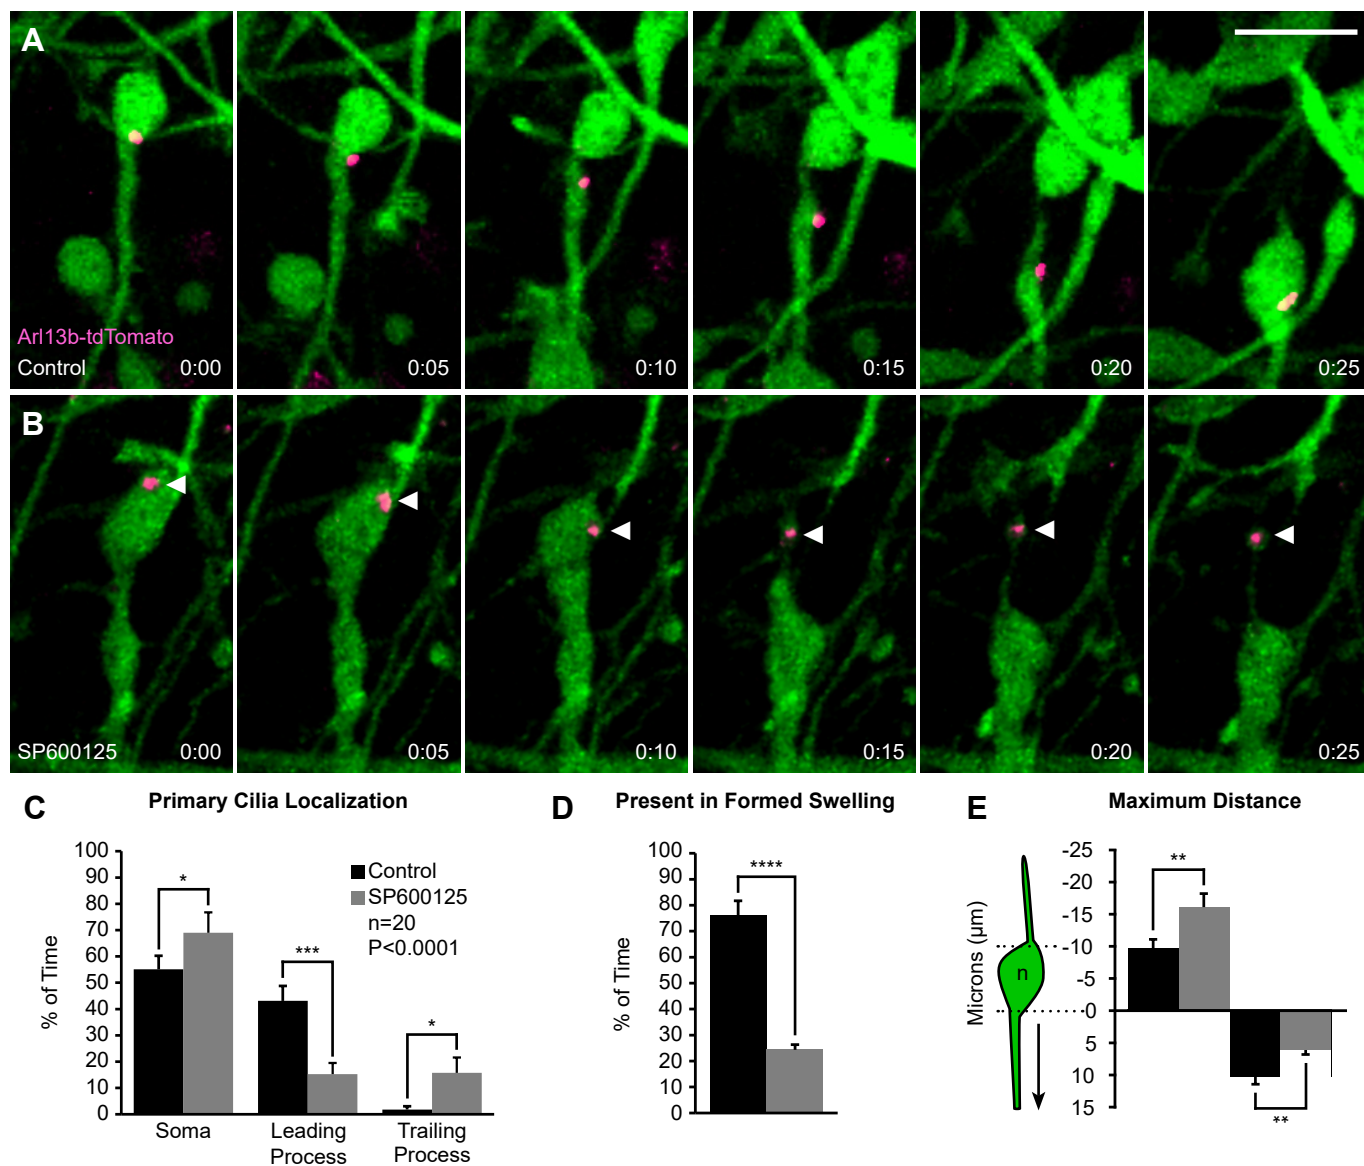

Source: https://biorxiv.org/content/biorxiv/early/2020/01/31/2020.01.30.927855.full-text.pdf
